# Supplementary material for: Genome-Wide Association Studies to Identify Loci and Candidate Genes Controlling Kernel Weight and Length in a Historical United States Wheat Population
Source: Front Plant Sci. 2018 Aug 3;9:1045. doi: 10.3389/fpls.2018.01045 (PMC6086202; doi:10.3389/fpls.2018.01045)
Supplement: TABLE S1 — The accuracy of imputation at different levels of marker masking using LDKNNi procedure in TASSEL. We used 30 sites for LD estimation. The number of nearest neighbors of entries was 10. [file Table_1.xlsx]

## Sheet: TS1
Masked	Error rate
0.01	0.0821
0.1	0.0883
0.2	0.0969
0.3	0.1081
0.4	0.1433
0.5	0.2371
0.6	0.3666
0.7	0.3867

## Sheet: TS2
Taxa	Name	Accession	Cluster assignmnent	Cluster1	Cluster2	Cluster3	Cluster4	Grouping by year	Year registered at NSGC	Institute	Accession
ID270	Clarafay	PI 502971	1	0.9999	0.0001	0.0001	0	1960 to 2000	1986	IN/PU	PI 502971
ID295	Kay	PI 502970	1	0.9999	0.0001	0.0001	0	1960 to 2000	1986	IN/PU	PI 502970
ID201	Dowel	PI 478895	1	0.9999	0.0001	0	0	1960 to 2000	1983	IN/PU	PI 478895
ID003	Downy	CItr17421	1	0.9999	0	0	0	1960 to 2000	1976	IN/PU	CItr17421
ID063	Arthur_71	CItr15282	1	0.9999	0	0	0	1960 to 2000	1971	IN/PU	CItr15282
ID069	Abe	Citr15375	1	0.9999	0	0	0	1960 to 2000	1972	IN/PU	Citr15375
ID126	Coker_68_19	CItr15229	1	0.9999	0	0	0	1960 to 2000	1970	SC	CItr15229
ID206	Oasis	CItr15929	1	0.9999	0	0	0	1960 to 2000	1973	IN/PU	CItr15929
ID299	Beau	Citr17420	1	0.9999	0	0	0	1960 to 2000	1976	IN/PU	Citr17420
ID209	Eider	PI 478896	1	0.9999	0	0	0.0001	1960 to 2000	1983	IN/PU	#N/A
ID073	Fuzz	CItr17412	1	0.9998	0.0001	0	0.0001	1960 to 2000	1975	IN/PU	CItr17412
ID142	Barb	PI 478897	1	0.9998	0	0	0.0001	1960 to 2000	1983	IN/PU	PI 478897
ID313	Burr	PI 478894	1	0.9991	0.0008	0	0.0001	1960 to 2000	1983	IN/PU	PI 478894
ID101	Arthur	CItr14425	1	0.9976	0.0023	0.0001	0.0001	1960 to 2000	1968	IN/PU	CItr14425
ID317	Roland	CItr17716	1	0.9878	0.0006	0.0001	0.0114	1960 to 2000	1977	IL	CItr17716
ID207	Adder	PI 491396	1	0.9669	0.0001	0.0329	0.0001	1960 to 2000	1985	IN/PU	PI 491396
ID104	Combo	PI 478893	1	0.9642	0.0129	0.0228	0.0001	1960 to 2000	1983	IN/PU	PI 478893
ID146	Scotty	PI 469294	1	0.9499	0.0007	0	0.0494	1960 to 2000	1982	IL	PI 469294
ID190	Coker_747	CItr17923	1	0.9345	0.0001	0.0001	0.0653	1960 to 2000	1976	SC	CItr17923
ID072	Tecumseh	CItr17287	1	0.9239	0.0729	0.0001	0.0031	1960 to 2000	1973	Michigan	CItr17287
ID080	Wheeler	CItr17900	1	0.8838	0.0003	0.0001	0.1159	1960 to 2000	1980	Varginia	CItr17900
ID182	OH_536	PI 602364	1	0.7688	0.1872	0.0002	0.0438	1960 to 2000	1997	Ohio	PI 602364
ID166	0566A1_3_1_48	NA	1	0.7665	0.0001	0.2334	0	After 2000	2005	IN/PU	NA
ID319	Tifton_2408	CItr17433	1	0.7597	0.0213	0.0001	0.2189	1960 to 2000	1975	Georgia	CItr17433
ID252	Vel	Citr15890	1	0.7489	0.0006	0	0.2505	1960 to 2000	1972	IN/PU	Citr15890
ID268	0513A1_1_3	NA	1	0.7394	0.0001	0.2604	0.0001	After 2000	2005	IN/PU	NA
ID177	05264A1_1_3_2	NA	1	0.6883	0	0.3108	0.0008	After 2000	2005	IN/PU	NA
ID156	0570A1_2_39_5	NA	1	0.6815	0.0001	0.3183	0.0001	After 2000	2005	IN/PU	NA
ID294	Madison	PI 547041	1	0.6805	0.1239	0.0001	0.1955	1960 to 2000	1990	Varginia	PI 547041
ID225	082A1_3_1	NA	1	0.6667	0	0.3332	0	After 2000	2008	IN/PU	NA
ID002	10641B1_9_11_7	NA	1	0.6549	0.0458	0.2436	0.0557	After 2000	2010	IN/PU	NA
ID035	Compton	PI 478892	1	0.6464	0.2822	0	0.0713	1960 to 2000	1983	IN/PU	PI 478892
ID050	05215A1_1_46	NA	1	0.6357	0.0001	0.35	0.0143	After 2000	2005	IN/PU	NA
ID202	07320A1_3	NA	1	0.6086	0.0002	0.2621	0.1291	After 2000	2007	IN/PU	NA
ID066	UGA_CAP_4	GSTR12505	1	0.5997	0.0537	0.0002	0.3465	After 2000	2008	Varginia	GSTR12505
ID264	05219A1_9_10	NA	1	0.5979	0	0.4021	0	After 2000	2005	IN/PU	NA
ID219	04620A1_1_7_4_17	NA	1	0.5835	0.0001	0.4164	0	After 2000	2004	IN/PU	NA
ID065	T_2891	CItr15577	1	0.568	0.1761	0.0001	0.2559	1960 to 2000	1968	Georgia	CItr15577
ID197	04702A1_18	NA	1	0.5652	0	0.4347	0	After 2000	2004	IN/PU	NA
ID259	SS550	GSTR12501	1	0.5598	0.0288	0.1652	0.2462	After 2000	2008	Varginia	GSTR12501
ID218	Wisc_X290B_6	CItr 13391	1	0.5498	0.1356	0.0001	0.3145	1920 to 1960	1957	Wisconsin	#N/A
ID057	Massey	CItr17953	1	0.5446	0.2886	0.0001	0.1667	1960 to 2000	1981	Varginia	CItr17953
ID039	Ceruga_6	PI 560120	1	0.5437	0.2786	0	0.1777	1960 to 2000	1991	Georgia	PI 560120
ID043	Ceruga_3	PI 560117	1	0.5405	0.2826	0.0001	0.1769	1960 to 2000	1991	Georgia	PI 560117
ID005	Freedom	PI 562382	1	0.5402	0.1308	0.1833	0.1457	1960 to 2000	1991	Ohio	PI 562382
ID233	Coker_762	CItr17924	1	0.5396	0.0759	0	0.3845	1960 to 2000	1980	SC	CItr17924
ID257	FW_815_X_2	CItr13121	1	0.5358	0.1011	0	0.363	1920 to 1960	1953	Georgia	CItr13121
ID046	059A1_2_6_4	NA	1	0.5358	0	0.4642	0	After 2000	2005	IN/PU	NA
ID188	Ceruga_11	PI 590953	1	0.5354	0.0001	0.1619	0.3026	1960 to 2000	1995	Georgia	PI 590953
ID093	Adena	PI 481852	1	0.5294	0.3095	0.0001	0.161	1960 to 2000	1983	Ohio	PI 481852
ID048	Ceruga_1	PI 560115	1	0.5279	0.243	0	0.2291	1960 to 2000	1991	Georgia	PI 560115
ID041	Ceruga_8	PI 590950	1	0.521	0.0009	0.1423	0.3357	1960 to 2000	1995	Georgia	PI 590950
ID267	INW0316	NA	1	0.5184	0	0.4816	0	After 2000	2003	IN/PU	NA
ID149	05219A1_9_2	NA	1	0.5152	0	0.4848	0	After 2000	2005	IN/PU	NA
ID230	P961341	PI 634825	1	0.506	0	0.494	0	After 2000	2003	IN/PU	PI 634825
ID208	H143_1_1_9_24	CItr13805	1	0.4965	0.0697	0	0.4338	1960 to 2000	1963	Wisconsin	CItr13805
ID293	FW_806_X_7	CItr13120	1	0.4961	0.0822	0.0001	0.4217	1920 to 1960	1953	Georgia	CItr13120
ID291	H143_1_1_3_6	CItr13792	1	0.479	0.1596	0	0.3614	1960 to 2000	1963	Wisconsin	CItr13792
ID153	H143_1_1_16_17_3_3	CItr13819	1	0.4658	0.0012	0.0001	0.533	1960 to 2000	1963	Wisconsin	CItr13819
ID181	H143_1_1_4_27	CItr13093	1	0.4167	0.2592	0	0.3241	1920 to 1960	1952	Wisconsin	CItr13093
ID056	H143_1_1_14_13	CItr13815	1	0.4385	0.191	0	0.3704	1960 to 2000	1963	Wisconsin	CItr13815
ID010	Wisc_H143_1_1_1_1	CItr 12419	1	0.4136	0.2002	0	0.3861	1920 to 1960	1947	Wisconsin	#N/A
ID027	Kenosha	CItr14025	1	0.3699	0.2292	0	0.4009	1960 to 2000	1968	Wisconsin	CItr14025
ID001	Wisc_X538_2	CItr 14024	1	0.3847	0.2026	0	0.4127	1960 to 2000	1964	Wisconsin	#N/A
ID200	WW19	CItr13227	1	0.3576	0.2245	0	0.4178	1920 to 1960	1955	IN/PU	CItr13227
ID053	H143_1_1_1_9_4	CItr13789	1	0.4461	0.1077	0	0.4461	1960 to 2000	1963	Wisconsin	CItr13789
ID261	INW9241	PI 583826	1	0.3553	0.3072	0.3052	0.0323	1960 to 2000	1994	IN/PU	PI 583826
ID312	INW8841	PI 531247	1	0.3612	0.3758	0.2629	0.0001	1960 to 2000	1989	IN/PU	PI 531247
ID277	Auburn	CItr17898	1	0.3748	0.303	0.2111	0.111	1960 to 2000	1981	IN/PU	CItr17898
ID215	Timwin	PI 519206	1	0.3893	0.2751	0.0269	0.3087	1960 to 2000	1967	Wisconsin	PI 519206
ID304	TN_1658	CItr17534	2	0.0001	0.9999	0	0	1960 to 2000	1976	Ohio	CItr17534
ID052	Logan	CItr14156	2	0	0.9999	0	0	1960 to 2000	1968	Ohio	CItr14156
ID074	TN_1298	CItr13357	2	0	0.9999	0	0	1920 to 1960	1956	Ohio	CItr13357
ID114	Seneca	CItr12529	2	0	0.9999	0	0	1920 to 1960	1950	Ohio	CItr12529
ID144	TN_1376	CItr13710	2	0	0.9999	0	0	1960 to 2000	1961	Ohio	CItr13710
ID169	TN_1365	CItr13708	2	0	0.9999	0	0	1960 to 2000	1961	Ohio	CItr13708
ID303	TN_1659	CItr17535	2	0	0.9999	0	0	1960 to 2000	1976	Ohio	CItr17535
ID311	Lucas	CItr12990	2	0	0.9999	0	0	1920 to 1960	1959	Ohio	CItr12990
ID120	Fultz	PI 5493	2	0	0.9999	0	0.0001	Before 1920	1871	historical	PI 5493
ID244	CLB_66	CItr17461	2	0	0.9999	0	0.0001	1960 to 2000	1977	Michigan	CItr17461
ID281	Red_May	CItr5336	2	0	0.9999	0	0.0001	Before 1920	1919	Missouri	CItr5336
ID173	TN_1497	CItr17482	2	0	0.9998	0.0001	0	1960 to 2000	1976	Ohio	CItr17482
ID198	TN_1598	CItr17507	2	0.0001	0.9998	0	0.0001	1960 to 2000	1976	Ohio	CItr17507
ID033	OH_127	CItr17565	2	0	0.9998	0	0.0001	1960 to 2000	1976	Ohio	CItr17565
ID189	TN_1596	CItr17506	2	0	0.9998	0	0.0001	1960 to 2000	1976	Ohio	CItr17506
ID213	TN_1340	CItr13481	2	0	0.9998	0	0.0001	1920 to 1960	1958	Ohio	CItr13481
ID265	TN_1317	CItr13480	2	0	0.9998	0	0.0001	1920 to 1960	1958	Ohio	CItr13480
ID235	TN_1691	CItr17551	2	0	0.9998	0	0.0002	1960 to 2000	1976	Ohio	CItr17551
ID251	TN_1560	CItr17492	2	0.0001	0.9997	0.0001	0.0001	1960 to 2000	1976	Ohio	CItr17492
ID266	TN_1559	CItr17491	2	0.0001	0.9997	0.0001	0.0001	1960 to 2000	1976	Ohio	CItr17491
ID191	TN_1591	CItr17503	2	0	0.9997	0.0001	0.0002	1960 to 2000	1976	Ohio	CItr17503
ID271	TN_1555	CItr17488	2	0.0001	0.9997	0	0.0001	1960 to 2000	1976	Ohio	CItr17488
ID098	OH_104	CItr17560	2	0.0001	0.9996	0.0001	0.0001	1960 to 2000	1976	Ohio	CItr17560
ID249	TN_1563	CItr17494	2	0.0002	0.9995	0.0001	0.0002	1960 to 2000	1976	Ohio	CItr17494
ID132	Dual	CItr 13083	2	0.0001	0.9994	0.0001	0.0004	1920 to 1960	1955	IN/PU	#N/A
ID081	TN_1612	CItr17510	2	0	0.9994	0.0001	0.0004	1960 to 2000	1976	Ohio	CItr17510
ID135	Fulton	CItr13358	2	0	0.9994	0	0.0006	1960 to 2000	1964	Ohio	CItr13358
ID123	TN_1383	CItr13900	2	0.0003	0.9993	0.0001	0.0003	1960 to 2000	1963	Ohio	CItr13900
ID183	Fulhio	CItr6999	2	0.0001	0.9991	0.0002	0.0006	Before 1920	1920	Ohio	CItr6999
ID212	TN_1584	CItr17500	2	0	0.9991	0.0001	0.0008	1960 to 2000	1976	Ohio	CItr17500
ID256	TN_1686	CItr17546	2	0.0001	0.999	0.0002	0.0008	1960 to 2000	1976	Ohio	CItr17546
ID031	TN_1631	CItr17524	2	0.0001	0.9989	0.0008	0.0001	1960 to 2000	1976	Ohio	CItr17524
ID106	Knox	Citr12798	2	0.0001	0.9989	0.0001	0.0008	1920 to 1960	1953	IN/PU	Citr12798
ID097	OH_102	CItr17559	2	0	0.9985	0.0001	0.0013	1960 to 2000	1976	Ohio	CItr17559
ID193	TN_1590	CItr17502	2	0.0001	0.9983	0.0001	0.0015	1960 to 2000	1976	Ohio	CItr17502
ID262	TN_1552	CItr17487	2	0.0001	0.9975	0.0001	0.0024	1960 to 2000	1976	Ohio	CItr17487
ID055	Wheedling	CItr4816	2	0	0.9957	0.0001	0.0042	Before 1920	1890	historical	CItr4816
ID023	Purdue_4521A6	CItr13290	2	0.0002	0.9942	0.0001	0.0055	1920 to 1960	1956	IN/PU	CItr13290
ID223	Red_Clawson	PI 565369	2	0	0.9924	0.0001	0.0075	Before 1920	1889	historical	PI 565369
ID040	TN_1629	CItr17522	2	0	0.9915	0	0.0084	1960 to 2000	1976	Ohio	CItr17522
ID058	Titan	CItr17762	2	0	0.986	0	0.0139	1960 to 2000	1978	Ohio	CItr17762
ID092	Red_Rock	CItr5597	2	0	0.9853	0	0.0146	Before 1920	1914	historical	CItr5597
ID084	TN_1611	CItr17509	2	0.0001	0.9822	0.0097	0.0079	1960 to 2000	1976	Ohio	CItr17509
ID019	Purdue_WW25	Citr13893	2	0.0001	0.9779	0.0218	0.0002	1960 to 2000	1963	IN/PU	Citr13893
ID269	TN_1436	CItr17477	2	0	0.9778	0	0.0221	1960 to 2000	1976	Ohio	CItr17477
ID014	Purdue_WW26	Citr13894	2	0.0001	0.9728	0.0269	0.0001	1960 to 2000	1963	IN/PU	Citr13894
ID234	TN_1693	CItr17553	2	0.0001	0.9684	0.0314	0.0001	1960 to 2000	1976	Ohio	CItr17553
ID012	TN_1630	CItr17523	2	0.0001	0.9621	0.0001	0.0377	1960 to 2000	1976	Ohio	CItr17523
ID028	30215A3_66_10	CItr9985	2	0.0001	0.9602	0.0001	0.0397	1920 to 1960	1931	IN/PU	CItr9985
ID022	Fultzo_Mediterranean	CItr4811	2	0	0.96	0.0001	0.0399	Before 1920	1898	historical	CItr4811
ID130	TN_1701	CItr17557	2	0.0411	0.9588	0	0.0001	1960 to 2000	1976	Ohio	CItr17557
ID121	Purdue_4126A9_42_1	CItr12799	2	0.0001	0.9537	0.0001	0.0461	1920 to 1960	1951	IN/PU	CItr12799
ID029	TN_1511	CItr17485	2	0	0.9507	0	0.0492	1960 to 2000	1976	Ohio	CItr17485
ID091	Ruler	CItr17314	2	0	0.9494	0.0002	0.0504	1960 to 2000	1975	Ohio	CItr17314
ID170	TN_1484	CItr17480	2	0	0.9475	0	0.0524	1960 to 2000	1976	Ohio	CItr17480
ID310	Purdue_4126A9_33_1_2_3_1	CItr13111	2	0.0001	0.9467	0.001	0.0521	1920 to 1960	1955	IN/PU	CItr13111
ID250	TN_1683	CItr17543	2	0.0001	0.9407	0.0547	0.0045	1960 to 2000	1976	Ohio	CItr17543
ID024	OH_135	CItr17567	2	0.0003	0.9394	0.0001	0.0603	1960 to 2000	1976	Ohio	CItr17567
ID017	Purdue_WW23	Citr13785	2	0.0001	0.9337	0.0542	0.0121	1960 to 2000	1962	IN/PU	Citr13785
ID282	TN_1540	CItr17486	2	0	0.9336	0	0.0663	1960 to 2000	1976	Ohio	CItr17486
ID245	Portage	CItr5654	2	0	0.9322	0	0.0678	1920 to 1960	1923	historical	CItr5654
ID315	Mediterranean	CItr3332	2	0	0.9321	0.0001	0.0677	Before 1920	1912	historical	CItr3332
ID323	Fairfield	Citr12013	2	0.0001	0.9275	0.0374	0.0351	1920 to 1960	1942	IN/PU	Citr12013
ID287	Monon	Citr13278	2	0.0001	0.9252	0.0735	0.0012	1920 to 1960	1959	IN/PU	Citr13278
ID070	TN_1619	CItr17516	2	0.0001	0.9214	0.0712	0.0073	1960 to 2000	1976	Ohio	CItr17516
ID154	Riley	Citr13702	2	0.0002	0.9192	0.0783	0.0024	1960 to 2000	1965	IN/PU	Citr13702
ID118	Baldrock	CItr11538	2	0	0.9141	0.0002	0.0857	1920 to 1960	1931	Michigan	CItr11538
ID075	Knox_62	CItr13485	2	0.0002	0.9131	0.0756	0.0111	1960 to 2000	1962	IN/PU	CItr13485
ID216	Ionia	CItr14469	2	0	0.9125	0	0.0874	1960 to 2000	1969	Michigan	CItr14469
ID020	Purdue_WW24	Citr13892	2	0.0591	0.9106	0.0089	0.0214	1960 to 2000	1963	IN/PU	Citr13892
ID221	American_Banner	CItr6943	2	0	0.895	0.0001	0.1049	1920 to 1960	1922	Michigan	CItr6943
ID309	Michigan_Amber	CItr11379	2	0	0.8944	0.0001	0.1055	Before 1920	1875	IN/PU	CItr11379
ID222	Wabash	CItr11384	2	0.0002	0.8911	0.0001	0.1087	1920 to 1960	1938	IN/PU	CItr11384
ID288	Rosette	CItr17931	2	0	0.8904	0.0001	0.1094	1960 to 2000	1981	IN/PU	CItr17931
ID162	Greeson	Citr6320	2	0	0.8883	0.0006	0.1111	Before 1920	1896	historical	Citr6320
ID062	Russian_Red	CItr5928	2	0	0.8871	0.0001	0.1127	Before 1920	1919	historical	CItr5928
ID224	Flint	CItr6307	2	0	0.8814	0.0001	0.1185	Before 1920	1814	Georgia	CItr6307
ID211	Wea	Citr11512	2	0.0001	0.8778	0	0.122	1920 to 1960	1932	IN/PU	Citr11512
ID253	TN_1689	CItr17549	2	0	0.8752	0.0001	0.1247	1960 to 2000	1976	Ohio	CItr17549
ID095	Todd	CItr13110	2	0.0002	0.8717	0.0107	0.1174	1920 to 1960	1956	Kentucky	CItr13110
ID241	Butler	CItr12527	2	0	0.8701	0	0.1298	1920 to 1960	1947	Ohio	CItr12527
ID255	TN_1687	CItr17547	2	0	0.8632	0	0.1368	1960 to 2000	1976	Ohio	CItr17547
ID236	TN_1690	CItr17550	2	0	0.8621	0	0.1378	1960 to 2000	1976	Ohio	CItr17550
ID254	TN_1688	CItr17548	2	0	0.8616	0.0001	0.1383	1960 to 2000	1976	Ohio	CItr17548
ID171	Frankenmuth	CItr17830	2	0	0.85	0.0001	0.1499	1960 to 2000	1979	Michigan	CItr17830
ID279	Leap	Citr4823	2	0	0.8492	0.0001	0.1506	Before 1920	1907	historical	Citr4823
ID286	TN_1308	CItr13169	2	0	0.8479	0	0.152	1920 to 1960	1954	Ohio	CItr13169
ID239	Gluten	CItr4856	2	0	0.8434	0.0001	0.1565	Before 1920	1913	IN/PU	CItr4856
ID243	Hillsdale	PI 489688	2	0.0001	0.8409	0.0002	0.1588	1960 to 2000	1983	Michigan	PI 489688
ID321	Trumbull	CItr5657	2	0.0001	0.839	0.0002	0.1607	Before 1920	1916	Ohio	CItr5657
ID157	Rice	Citr5734	2	0	0.8362	0.0001	0.1637	Before 1920	1883	Varginia	Citr5734
ID136	Purdue_No_1	CItr 11380	2	0	0.8311	0.0001	0.1688	1920 to 1960	1934	IN/PU	#N/A
ID119	Stacy	Citr17861	2	0.0001	0.8246	0.0001	0.1752	1960 to 2000	1980	Georgia	Citr17861
ID160	Canawa	Citr11854	2	0	0.8244	0.0001	0.1755	1920 to 1960	1935	West Varginia	Citr11854
ID238	Fultz_Selection	CItr11845	2	0.0001	0.8239	0.0001	0.1759	1920 to 1960	1938	historical	CItr11845
ID137	Vermillion	Citr12748	2	0.0001	0.8146	0.0001	0.1853	1920 to 1960	1955	IN/PU	Citr12748
ID034	GA_73_3_3_3_5	PI 519192	2	0.0001	0.8121	0.0001	0.1878	1960 to 2000	1987	Georgia	PI 519192
ID026	Jones_Fife	CItr4468	2	0	0.8113	0.0001	0.1886	Before 1920	1889	historical	CItr4468
ID042	TN_1628	CItr17521	2	0.0001	0.8049	0.0341	0.161	1960 to 2000	1976	Ohio	CItr17521
ID273	Parcam	CItr12294	2	0.018	0.802	0.0001	0.1798	1920 to 1960	1951	IN/PU	CItr12294
ID009	LaPonte	Citr12557	2	0.0924	0.7977	0.037	0.073	1920 to 1960	1957	IN/PU	Citr12557
ID246	29408_52	CItr11849	2	0.0001	0.7873	0.0001	0.2126	1920 to 1960	1939	IN/PU	CItr11849
ID232	Agrus	CItr13228	2	0.0001	0.7868	0.0001	0.213	1960 to 2000	1972	IN/PU	CItr13228
ID015	Waban	CItr12992	2	0.0001	0.7776	0.0001	0.2222	1960 to 2000	1978	IN/PU	CItr12992
ID174	Nigger	CItr5366	2	0.0001	0.7721	0.0002	0.2277	Before 1920	1913	historical	CItr5366
ID199	Wisc_18_4	CItr 10019	2	0.0001	0.7655	0.0002	0.2342	1920 to 1960	1930	Wisconsin	#N/A
ID087	Stella	CItr17937	2	0.0005	0.7607	0.0246	0.2143	1960 to 2000	1981	IN/PU	CItr17937
ID006	Waban_2	CItr14018	2	0.0001	0.7599	0.0001	0.2399	1960 to 2000	1964	IN/PU	CItr14018
ID176	Illini_Chief	CItr5406	2	0	0.7587	0	0.2412	Before 1920	1915	historical	CItr5406
ID151	Red_Wave	CItr3500	2	0	0.7582	0.0001	0.2417	Before 1920	1906	historical	CItr3500
ID045	GR860	PI 508288	2	0.0001	0.7463	0.0488	0.2048	1960 to 2000	1987	Ohio	PI 508288
ID083	Ella	CItr17938	2	0.0002	0.7436	0.0402	0.216	1960 to 2000	1981	IN/PU	CItr17938
ID179	Goens	CItr4857	2	0	0.7436	0.0007	0.2557	Before 1920	1913	IN/PU	CItr4857
ID214	Valley	CItr5923	2	0.0001	0.7414	0.0001	0.2585	Before 1920	1917	historical	CItr5923
ID109	Excel	PI 555465	2	0.0956	0.7394	0.1649	0.0001	1960 to 2000	1990	Ohio	PI 555465
ID247	Pride_of_Genesee	CItr3365	2	0.0001	0.7377	0.0002	0.262	Before 1920	1893	historical	CItr3365
ID302	Penquite	CItr5948	2	0	0.7347	0.0001	0.2652	Before 1920	1858	Ohio	CItr5948
ID220	Purdue_40145A3_13_1_1_1	CItr13084	2	0.0001	0.7324	0.0001	0.2674	1920 to 1960	1953	IN/PU	CItr13084
ID298	Wardal	CItr13372	2	0.0001	0.7154	0.0001	0.2845	1920 to 1960	1956	IN/PU	CItr13372
ID082	Purkof	CItr8381	2	0.0001	0.7128	0.0054	0.2817	1920 to 1960	1923	IN/PU	CItr8381
ID147	Vigo	Citr12220	2	0.0001	0.7084	0.0001	0.2914	1920 to 1960	1946	IN/PU	Citr12220
ID148	OH07_263_3	NA	2	0.0002	0.698	0.1448	0.1571	After 2000	2007	Ohio	NA
ID318	Fulcaster	CItr4862	2	0.0001	0.6975	0.0002	0.3022	Before 1920	1886	historical	CItr4862
ID059	Key	Citr15928	2	0.0004	0.6964	0.0005	0.3027	1960 to 2000	1976	IN/PU	Citr15928
ID263	Taylor_16	CItr13389	2	0.0001	0.6922	0.0004	0.3074	1920 to 1960	1957	Kentucky	CItr13389
ID086	Golden_Cross	CItr5180	2	0	0.6917	0.0238	0.2844	Before 1920	1888	historical	CItr5180
ID192	Ceruga_15	PI 590957	2	0.0001	0.6901	0.0017	0.3081	1960 to 2000	1995	Georgia	PI 590957
ID275	Becker	PI 494524	2	0.0001	0.6891	0.0016	0.3092	1960 to 2000	1985	Ohio	PI 494524
ID090	Kentucky_4097_35	CItr12659	2	0.0001	0.688	0.0017	0.3101	1920 to 1960	1948	Kentucky	CItr12659
ID150	Benhur	Citr14054	2	0.1494	0.6825	0.1631	0.0049	1960 to 2000	1966	IN/PU	Citr14054
ID203	29408A2_6_9_1_1_2	CItr12017	2	0.0001	0.6767	0.0001	0.3231	1920 to 1960	1944	IN/PU	CItr12017
ID117	Merrimac	PI 535454	2	0.0001	0.6731	0.0069	0.3199	1960 to 2000	1989	Wisconsin	PI 535454
ID011	Purdue_WW27	CItr14109	2	0.0001	0.6721	0.0022	0.3256	1960 to 2000	1975	IN/PU	CItr14109
ID032	Saluda	PI 480474	2	0.0001	0.6675	0.0418	0.2906	1960 to 2000	1983	Varginia	PI 480474
ID105	Gipsy	CItr3436	2	0	0.6455	0.0001	0.3543	Before 1920	1912	historical	CItr3436
ID077	INW0412	NA	2	0	0.6437	0.0497	0.3065	After 2000	2004	IN/PU	NA
ID037	Glacier	PI 555586	2	0.0056	0.6421	0.0004	0.3518	1960 to 2000	1991	Wisconsin	PI 555586
ID102	Elmo	CItr17887	2	0.1576	0.6367	0.0446	0.1611	1960 to 2000	1980	IN/PU	CItr17887
ID237	Berkeley_Rock	CItr8272	2	0	0.6295	0.0001	0.3704	1920 to 1960	1922	Michigan	CItr8272
ID194	Michikof	CItr6990	2	0.0001	0.6274	0.0001	0.3725	Before 1920	1920	IN/PU	CItr6990
ID276	E2041_sel	GSTR14281	2	0	0.6142	0.0863	0.2994	After 2000	2015	Michigan	GSTR14281
ID283	KY_83C_16_2	PI 586687	2	0.0003	0.61	0.1175	0.2722	1960 to 2000	1994	kentucky	PI 586687
ID290	Grandprize	CItr4876	2	0.0001	0.5893	0.0001	0.4105	Before 1920	1910	historical	CItr4876
ID047	Taylor_57	CItr13376	2	0.0001	0.5797	0.0003	0.4199	1920 to 1960	1956	Georgia	CItr13376
ID324	IL_85_3132_1	PI 586683	2	0.0001	0.5785	0.2262	0.1953	1960 to 2000	1994	IL	PI 586683
ID112	Argee	CItr17606	2	0.0001	0.573	0.0001	0.4268	1960 to 2000	1976	Wisconsin	CItr17606
ID038	Allegiance	PI 641952	2	0.0005	0.5694	0.0231	0.407	After 2000	2002	kentucky	PI 641952
ID186	Fillmore	PI 469272	2	0.1053	0.5599	0.1491	0.1857	1960 to 2000	1982	IN/PU	PI 469272
ID228	H_189_29	CItr12756	2	0.0001	0.5511	0	0.4487	1920 to 1960	1950	Wisconsin	CItr12756
ID308	T_76_864	CItr17605	2	0.0002	0.5508	0.0002	0.4488	1960 to 2000	1976	Georgia	CItr17605
ID163	Martin_Amber	PI 565360	2	0.0001	0.5506	0.0001	0.4493	Before 1920	1882	historical	PI 565360
ID030	Rudy	CItr4873	2	0.0001	0.5505	0.0577	0.3918	Before 1920	1871	Ohio	CItr4873
ID004	IN93HF265_4	PI 576441	2	0.0533	0.5499	0.0624	0.3343	1960 to 2000	1993	IN/PU	PI 576441
ID240	IN93HF407	PI 576444	2	0.0011	0.5461	0.0212	0.4316	1960 to 2000	1994	IN/PU	PI 576444
ID322	OH_141	CItr17570	2	0.4573	0.5425	0	0.0002	1960 to 2000	1976	Ohio	CItr17570
ID272	T_76_2015	CItr17720	2	0.0002	0.5419	0.0004	0.4575	1960 to 2000	1977	Georgia	CItr17720
ID115	0537A1_12	NA	2	0.0001	0.5408	0.1049	0.3543	After 2000	2005	IN/PU	NA
ID044	Omega_78	CItr17721	2	0.0001	0.5357	0.0005	0.4636	1960 to 2000	1979	Georgia	CItr17721
ID296	Potomac	CItr15292	2	0.0001	0.5291	0.0839	0.3869	1960 to 2000	1975	Varginia	CItr15292
ID278	Patterson	PI 583825	2	0.2589	0.5273	0.2134	0.0005	1960 to 2000	1995	IN/PU	PI 583825
ID217	Hart	CItr17426	2	0	0.5261	0.1183	0.3556	1960 to 2000	1976	Missouri	CItr17426
ID292	L2036A2_89_5_3H	CItr11382	2	0.0001	0.5199	0.0001	0.48	1920 to 1960	1931	IN/PU	CItr11382
ID128	Dular	CItr13373	2	0.0002	0.515	0.0067	0.4781	1920 to 1960	1957	IN/PU	CItr13373
ID100	Coker_68_15	CItr17921	2	0.0001	0.5141	0.0014	0.4844	1960 to 2000	1971	SC	CItr17921
ID316	0537A1_3_12	NA	2	0.0001	0.5104	0.1085	0.3811	After 2000	2005	IN/PU	NA
ID125	05251A1_1_77	NA	2	0.0001	0.5072	0.2756	0.2171	After 2000	2005	IN/PU	NA
ID076	77531B1_27_3_1_2	GSTR11273	2	0.0001	0.5068	0.0001	0.493	After 2000	2008	IN/PU	GSTR11273
ID122	Wakeland	CItr13382	2	0.0004	0.4608	0.0003	0.5385	1920 to 1960	1959	NC	CItr13382
ID108	Verne	PI 547901	2	0.0104	0.454	0.2748	0.2608	1960 to 2000	1990	kentucky	PI 547901
ID248	Chesapeake	PI 643935	2	0.0001	0.4779	0.2607	0.2613	After 2000	2005	maryland	PI 643935
ID124	Benni	Citr17888	2	0.0002	0.4736	0.197	0.3292	1960 to 2000	1980	IN/PU	Citr17888
ID099	Carala	CItr12184	2	0.0001	0.4858	0.0852	0.4289	1920 to 1960	1940	NC	CItr12184
ID007	CI_11680	CItr11680	2	0	0.5029	0.0001	0.497	1920 to 1960	1934	IN/PU	CItr11680
ID172	H_S_9	CItr 12219	2	0.0001	0.497	0.0001	0.5029	1920 to 1960	1941	Ohio	#N/A
ID285	INW0302	NA	2	0.0003	0.3761	0.3252	0.2984	After 2000	2003	IN/PU	NA
ID210	08334A1_31	NA	2	0.1149	0.3846	0.2806	0.22	After 2000	2008	IN/PU	NA
ID260	Tyler	CItr17899	2	0	0.3603	0.2213	0.4183	1960 to 2000	1980	Varginia	CItr17899
ID168	Gasta	CItr11398	3	0.0001	0.5055	0.0094	0.485	1920 to 1960	1931	Georgia	CItr11398
ID008	04606RA1_1_7_1_6	NA	3	0.0001	0.0001	0.9998	0	After 2000	2004	IN/PU	NA
ID049	05247A1_7_7_3_1	NA	3	0	0.0001	0.9998	0.0001	After 2000	2005	IN/PU	NA
ID111	05222A1_7	NA	3	0	0.0001	0.9998	0.0001	After 2000	2005	IN/PU	NA
ID116	05247A1_7_3	NA	3	0	0.0001	0.9998	0.0001	After 2000	2005	IN/PU	NA
ID061	05247A1_7_3_27	NA	3	0	0.0001	0.9997	0.0001	After 2000	2005	IN/PU	NA
ID307	05247A1_7_3_114	NA	3	0	0.0001	0.9997	0.0002	After 2000	2015	IN/PU	NA
ID079	04606RA1_1_7_1	NA	3	0	0.0003	0.9996	0.0001	After 2000	2004	IN/PU	NA
ID178	06497A1_7_3	NA	3	0.0001	0.0004	0.9994	0	After 2000	2015	IN/PU	NA
ID140	04606RA1_6	NA	3	0.0001	0.0009	0.999	0	After 2000	2004	IN/PU	NA
ID078	4620	NA	3	0.0001	0.1768	0.8228	0.0004	After 2000	2015	IN/PU	NA
ID113	0527A1_9_15_178	NA	3	0	0.0003	0.76	0.2397	After 2000	2005	IN/PU	NA
ID159	0527A1_9_9_2	NA	3	0	0.0001	0.7548	0.245	After 2000	2005	IN/PU	NA
ID167	0527A1_9_9_4	NA	3	0	0.0003	0.7379	0.2618	After 2000	2005	IN/PU	NA
ID071	0527A1_9_14_4_3_1_1	NA	3	0	0.0017	0.7269	0.2713	After 2000	2015	IN/PU	NA
ID226	06403A1_4	NA	3	0.0005	0.2865	0.6218	0.0912	After 2000	2006	IN/PU	NA
ID314	07287RA1_14	NA	3	0.0002	0.2571	0.6214	0.1213	After 2000	2007	IN/PU	NA
ID184	058RA1_5_6_1	NA	3	0.0001	0.316	0.619	0.0648	After 2000	2005	IN/PU	NA
ID021	05222A1_1_2_7	NA	3	0.4066	0	0.5934	0	After 2000	2005	IN/PU	NA
ID103	05247A1_1	NA	3	0.4129	0	0.587	0	After 2000	2005	IN/PU	NA
ID134	05251A1_1_136_9_5	NA	3	0.0001	0.3417	0.5135	0.1447	After 2000	2005	IN/PU	NA
ID158	Grant	PI 572548	3	0.1256	0.3615	0.5122	0.0007	1960 to 2000	1993	IN/PU	PI 572548
ID175	02444A1_23_1_3	NA	3	0.0001	0.3902	0.4649	0.1449	After 2000	2002	IN/PU	NA
ID141	99751	PI 468977	3	0.0211	0.4093	0.4648	0.1048	1960 to 2000	1999	SC	PI 468977
ID131	0722A1_1_7	NA	3	0.0001	0.393	0.456	0.1509	After 2000	2007	IN/PU	NA
ID145	Clark	PI 512337	3	0.3091	0.2451	0.4457	0.0001	1960 to 2000	1987	IN/PU	PI 512337
ID300	INW8852	PI 531248	3	0.3181	0.2771	0.4047	0.0001	1960 to 2000	1989	IN/PU	PI 531248
ID138	053A1_2_5_3	NA	3	0.0034	0.4099	0.3787	0.208	After 2000	2005	IN/PU	NA
ID164	IL_77_4259	PI 495015	4	0	0.119	0.2939	0.587	1960 to 2000	1985	IL	PI 495015
ID305	SSL_92_96	PI 641763	4	0.0001	0.12	0.2773	0.6026	After 2000	2004	IN/PU	PI 641763
ID129	UGA_CAP_9	GSTR12509	4	0.0001	0.3625	0.2456	0.3918	After 2000	2008	Varginia	GSTR12509
ID301	Glory	PI 592750	4	0	0.345	0.2181	0.4369	1960 to 2000	1992	Ohio	PI 592750
ID064	Wakefield	PI 547040	4	0.0001	0.3323	0.1609	0.5067	1960 to 2000	1990	Varginia	PI 547040
ID139	BLUEBOY	CItr 12749	4	0.0001	0.2546	0.1534	0.592	1960 to 2000	1967	NC	CItr 12749
ID094	FW_701_X_31	CItr13122	4	0.0001	0.3231	0.0771	0.5997	1920 to 1960	1953	Georgia	CItr13122
ID297	MI_71109_385	CItr17837	4	0.0162	0.2641	0.0736	0.646	1960 to 2000	1979	Michigan	CItr17837
ID161	P921696	PI 633876	4	0.0005	0.301	0.0733	0.6253	After 2000	2003	IN/PU	PI 633876
ID180	T_3562	PI 518879	4	0.0001	0.2904	0.0667	0.6428	1960 to 2000	1987	Georgia	PI 518879
ID155	414A9_2_3	CItr12749	4	0	0.1991	0.0626	0.7383	1920 to 1960	1950	IN/PU	CItr12749
ID133	Diehl_Mediterranean	CItr1395	4	0.0009	0.2512	0.0509	0.697	Before 1920	1884	historical	CItr1395
ID127	3817A1_7_4_1_13	CItr12373	4	0	0.3935	0.0455	0.5609	1920 to 1960	1944	IN/PU	CItr12373
ID060	Link	CItr4866	4	0.0001	0.3574	0.0344	0.6082	Before 1920	1913	IN/PU	CItr4866
ID229	Arcadian	PI 565362	4	0.0001	0.4803	0.0324	0.4873	Before 1920	1895	historical	PI 565362
ID320	Lafron	CItr14022	4	0.0001	0.3047	0.0295	0.6657	1960 to 2000	1964	IN/PU	CItr14022
ID306	Anex	CItr14020	4	0.0001	0.2137	0.0261	0.7601	1960 to 2000	1964	IN/PU	CItr14020
ID051	Russell	CItr12484	4	0.0281	0.2054	0.0131	0.7533	1920 to 1960	1959	Wisconsin	CItr12484
ID016	Sanford	CItr12026	4	0.0001	0.4448	0.0009	0.5542	1920 to 1960	1940	Georgia	CItr12026
ID088	Funk_Seeds_7171	CItr17403	4	0.0001	0.3048	0.0008	0.6943	1960 to 2000	1975	IL	CItr17403
ID280	77531A1_7_11_2_2	GSTR11208	4	0.0002	0.496	0.0006	0.5032	After 2000	2008	IN/PU	GSTR11208
ID067	Chancellor	CItr12333	4	0.0001	0.4774	0.0005	0.522	1920 to 1960	1947	Georgia	CItr12333
ID054	Lani	CItr14021	4	0.0001	0.2622	0.0005	0.7373	1960 to 2000	1964	IN/PU	CItr14021
ID274	Charmany	PI 491537	4	0.0001	0.4614	0.0004	0.5381	1960 to 2000	1984	Wisconsin	PI 491537
ID110	Satanta	PI 583672	4	0	0.3196	0.0003	0.6801	1960 to 2000	1969	IL	PI 583672
ID068	77531A1_15_8_2_2	GSTR11215	4	0.0001	0.4487	0.0002	0.5511	After 2000	2008	IN/PU	GSTR11215
ID289	MI_71108_367	CItr17835	4	0.0003	0.2637	0.0002	0.7357	1960 to 2000	1979	Michigan	CItr17835
ID143	77531B1_60_13_2_1	GSTR11302	4	0	0.473	0.0001	0.5269	After 2000	2008	IN/PU	GSTR11302
ID107	W2032A_11_24_1	CItr11531	4	0	0.4108	0.0001	0.5891	1920 to 1960	1932	IN/PU	CItr11531
ID195	CI_8243	CItr8243	4	0	0.3949	0.0001	0.6049	1920 to 1960	1926	IN/PU	CItr8243
ID196	Silversheaf	CItr2496	4	0	0.3491	0.0001	0.6508	Before 1920	1903	historical	CItr2496
ID036	Cherokee	CItr11405	4	0	0.2966	0.0001	0.7032	1920 to 1960	1934	Georgia	CItr11405
ID165	Wisc_No_312_27	CItr 11724	4	0.0001	0.2796	0.0001	0.7202	1920 to 1960	1935	Wisconsin	#N/A
ID185	Blackhawk	CItr12218	4	0	0.2609	0.0001	0.739	1920 to 1960	1944	Wisconsin	CItr12218
ID025	Ashkof	CItr6680	4	0	0.2436	0.0001	0.7562	1920 to 1960	1923	Wisconsin	CItr6680
ID227	Howell	PI 552816	4	0.0001	0.1995	0.0001	0.8004	1960 to 2000	1991	IL	PI 552816
ID204	CLB_49	CItr17455	4	0.0001	0.1607	0.0001	0.8391	1960 to 2000	1977	Michigan	CItr17455
ID187	CLB_57	CItr17457	4	0.0001	0.1506	0.0001	0.8492	1960 to 2000	1975	Michigan	CItr17457
ID096	Lola	PI 562618	4	0.0001	0.0006	0.0001	0.9993	1960 to 2000	1993	IN/PU	PI 562618
ID085	H143_1_1_8_35_7_5_5	CItr13802	4	0.4223	0.1022	0	0.4754	1960 to 2000	1963	Wisconsin	CItr13802
ID089	H143_1_1_5_38_5	CItr13796	4	0.4522	0.0532	0	0.4946	1960 to 2000	1963	Wisconsin	CItr13796
ID284	Joy	PI 562616	4	0.3945	0	0	0.6054	1960 to 2000	1993	IN/PU	PI 562616
ID205	Karen	PI 562617	4	0.2261	0	0	0.7738	1960 to 2000	1993	IN/PU	PI 562617
ID152	Purdue_TBR_76_1_3	CItr17768	4	0.0001	0.2216	0	0.7783	1960 to 2000	1979	IN/PU	CItr17768
ID231	Carol	PI 562612	4	0	0.0001	0	0.9999	1960 to 2000	1993	IN/PU	PI 562612
ID242	Flynn	PI 562614	4	0	0.0001	0	0.9999	1960 to 2000	1993	IN/PU	PI 562614
ID013	Iris	PI 562615	4	0	0	0	0.9999	1960 to 2000	1993	IN/PU	PI 562615
ID018	Erin	PI 562613	4	0	0	0	0.9999	1960 to 2000	1993	IN/PU	PI 562613
ID258	Molly	PI 562619	4	0	0	0	0.9999	1960 to 2000	1993	IN/PU	PI 562619

## Sheet: TS3
			KW16					KW17					KW1617
SNP	Chromosme	Position	Variants	MAF	-log(P)	R2	Allelic Effects	Variants	MAF	-log(P)	R2	Allelic Effects	Variants	MAF	-log(P)	R2	Allelic Effects
S1B_44851359	1B	44851359	C/A	0.13774	1.16774	1.25171	-0.268427	C/A	0.05634	3.83657	6.08605	2.57281	C/A	0.17593	2.66746	2.6977	0.927147
S1B_44851392	1B	44851392	G/A	0.13774	1.16774	1.25171	-0.268427	G/A	0.06308	3.83657	6.08605	2.57281	G/A	0.17593	2.66746	2.6977	0.927147
S1B_44851394	1B	44851394	G/T	0.13774	1.16774	1.25171	-0.268427	G/T	0.04673	3.83657	6.08605	-2.57281	G/T	0.17593	2.66746	2.6977	-0.927147
S1B_114608554	1B	114608554	C/T	0.27736	4.45717	6.6106	-0.268427	C/T	0.31455	0.646711	0.600441	0.519102	C/T	0.28173	2.64	2.66402	0.55675
S2A_4013484	2A	4013484	C/A	0.00755	0.225042	0.105208	-0.971464	C/A	0.31455	3.46775	5.3926	-3.34001	C/A	0.07407	3.18923	3.34535	-1.60256
S2A_600416078	2A	600416078	A/C	0.11509	0.312113	0.180196	-0.971464	A/C	0.28738	3.61847	5.6748	-2.63235	A/C	0.09877	1.19239	0.972044	-0.485303
S2A_602118121	2A	602118121	G/T	0.10566	1.85174	2.27718	-0.971464	G/T	0.33879	2.0974	2.91535	3.08632	G/T	0.10957	3.47265	3.70253	2.03822
S2A_602118149	2A	602118149	G/T	0.10566	1.85174	2.27718	-0.971464	G/T	0.33879	2.0974	2.91535	3.08632	G/T	0.10957	3.47265	3.70253	2.03822
S2B_16897947	2B	16897947	G/A	0.35882	3.76845	5.42172	-0.971464	G/A	0.10047	0.674747	0.638512	0.474584	G/A	0.3535	3.08389	3.21351	0.544673
S2B_16897970	2B	16897970	T/G	0.37059	3.73783	5.36946	-0.971464	T/G	0.06308	0.734975	0.721878	1.00043	T/G	0.36306	2.71647	2.75794	0.999938
S2B_316307395	2B	316307395	G/T	0.25568	0.817175	0.767784	-0.971464	G/T	0.06308	3.52449	5.49865	-2.56758	G/T	0.26161	2.66317	2.69244	-1.05959
S2B_316307438	2B	316307438	G/T	0.25568	0.817175	0.767784	-0.971464	G/T	0.28169	3.52449	5.49865	-2.56758	G/T	0.26161	2.66317	2.69244	-1.05959
S2D_9581257	2D	9581257	C/T	0.30755	3.73233	5.36008	-0.971464	C/T	0.1986	0.107347	0.031496	0.111955	C/T	0.2963	2.02122	1.91762	0.431011
S2D_82890831	2D	82890831	G/T	0.11509	0.515868	0.393781	-0.971464	G/T	0.1986	3.74183	5.907	-8.28161	G/T	0.11574	3.04973	3.17088	-3.90653
S2D_82890844	2D	82890844	G/A	0.11509	0.515868	0.393781	-0.971464	G/A	0.1986	3.74183	5.907	8.28161	G/A	0.11574	3.04973	3.17088	3.90653
S2D_82890849	2D	82890849	A/C	0.11509	0.515868	0.393781	-0.971464	A/C	0.11215	3.74183	5.907	-8.28161	A/C	0.11574	3.04973	3.17088	-3.90653
S2D_481961275	2D	481961275	T/C	0.11509	0.271388	0.143562	-0.971464	T/C	0.0771	3.6388	5.71299	6.5431	T/C	0.1142	2.60705	2.62366	2.59015
S2D_481961286	2D	481961286	A/T	0.11509	0.271388	0.143562	-0.971464	A/T	0.1215	3.6388	5.71299	-6.5431	A/T	0.1142	2.60705	2.62366	-2.59015
S2D_481961308	2D	481961308	A/G	0.11509	0.271388	0.143562	-0.971464	A/G	0.1215	3.6388	5.71299	-6.5431	A/G	0.1142	2.60705	2.62366	-2.59015
S2D_481961312	2D	481961312	T/A	0.11509	0.271388	0.143562	-0.971464	T/A	0.35613	3.6388	5.71299	6.5431	T/A	0.1142	2.60705	2.62366	2.59015
S2D_609315869	2D	609315869	G/T	0.06226	0.829923	0.784631	-0.971464	G/T	0.36085	3.72991	5.88451	-2.7925	G/T	0.06173	3.06009	3.18379	-1.16482
S3A_460891597	3A	460891597	A/T	0.33019	2.06891	2.61727	-0.971464	A/T	0.28404	3.24173	4.97263	-1.42279	A/T	0.31481	3.46891	3.6978	-0.633757
S3B_810415758	3B	810415758	T/C	0.48302	3.28431	4.60196	-0.971464	T/C	0.28404	2.41911	3.48052	1.17129	T/C	0.46759	4.82304	5.44666	0.773508
S3B_810463924	3B	810463924	G/A	0.47547	2.90596	3.97173	-0.971464	G/A	0.1215	2.57873	3.76512	1.21321	G/A	0.46142	4.74924	5.34974	0.76899
S3B_810538925	3B	810538925	A/C	0.47358	2.84347	3.8686	-0.971464	A/C	0.1215	2.51113	3.64428	-1.19488	A/C	0.45988	4.57403	5.12031	-0.754061
S3B_810538933	3B	810538933	C/G	0.47358	2.84347	3.8686	-0.971464	C/G	0.1215	2.51113	3.64428	-1.19488	C/G	0.45988	4.57403	5.12031	-0.754061
S3B_810543063	3B	810543063	T/C	0.48113	3.22916	4.50949	-0.971464	T/C	0.1215	2.18408	3.06645	1.06631	T/C	0.46759	4.70107	5.28656	0.743268
S3B_810544765	3B	810544765	T/C	0.48302	2.93802	4.02474	-0.971464	T/C	0.0771	2.05863	2.84806	1.03244	T/C	0.47222	4.31958	4.78893	0.710468
S3B_810549361	3B	810549361	A/T	0.11509	4.03198	5.87381	-0.971464	A/T	0.12617	0.238752	0.126786	0.484183	A/T	0.09722	3.40703	3.61953	0.906801
S3B_810611280	3B	810611280	A/G	0.48302	2.93802	4.02474	-0.971464	A/G	0.12617	2.05863	2.84806	-1.03244	A/G	0.47222	4.31958	4.78893	-0.710468
S3B_810611284	3B	810611284	G/C	0.48302	2.93802	4.02474	-0.971464	G/C	0.12617	2.05863	2.84806	1.03244	G/C	0.47222	4.31958	4.78893	0.710468
S3B_810656139	3B	810656139	C/T	0.47358	2.69855	3.63057	-0.971464	C/T	0.24533	2.41911	3.48052	-1.17129	C/T	0.45988	4.36326	4.84567	-0.734457
S3B_810657366	3B	810657366	A/G	0.48679	3.24374	4.53391	-0.971464	A/G	0.32477	2.15486	3.01541	-1.06576	A/G	0.47377	4.69595	5.27985	-0.744569
S3B_810902026	3B	810902026	G/A	0.47547	2.90596	3.97173	-0.971464	G/A	0.46495	2.31452	3.29549	1.13608	G/A	0.46296	4.42944	4.93173	0.740148
S3B_815282739	3B	815282739	T/G	0.46604	3.47046	4.91548	-0.971464	T/G	0.46495	2.58374	3.7741	1.17782	T/G	0.46142	5.15324	5.88239	0.798034
S3B_815282961	3B	815282961	G/A	0.46038	3.60447	5.14249	-0.971464	G/A	0.46729	2.03256	2.80293	1.01907	G/A	0.45679	4.72569	5.31883	0.75895
S3B_817459692	3B	817459692	G/A	0.40566	3.64174	5.20582	-0.971464	G/A	0.46729	1.13718	1.32049	-0.698539	G/A	0.39815	2.9408	3.03528	-0.541061
S3B_818316042	3B	818316042	C/T	0.36792	4.05849	5.91954	-0.971464	C/T	0.45561	0.893015	0.949438	0.576863	C/T	0.37037	2.90163	2.98666	0.52624
S3B_818336545	3B	818336545	G/T	0.31132	5.05453	7.66058	-0.971464	G/T	0.4486	0.178525	0.0774343	0.172595	G/T	0.30401	2.68136	2.71478	0.512553
S3B_818336557	3B	818336557	G/T	0.36792	4.73518	7.0979	-0.971464	G/T	0.03505	1.12004	1.29382	0.672842	G/T	0.37191	3.52215	3.76527	0.589847
S3B_818336580	3B	818336580	G/A	0.36792	4.73518	7.0979	-0.971464	G/A	0.4486	1.12004	1.29382	-0.672842	G/A	0.37191	3.52215	3.76527	-0.589847
S3B_818336846	3B	818336846	A/C	0.36604	4.57675	6.8192	-0.971464	A/C	0.4486	0.953289	1.03908	0.603196	A/C	0.36728	3.28314	3.46331	0.564938
S3B_818353805	3B	818353805	G/T	0.40943	3.79955	5.47486	-0.971464	G/T	0.46495	1.38291	1.71159	0.771156	G/T	0.41821	3.42774	3.6457	0.577817
S3B_818442459	3B	818442459	G/C	0.41698	3.92044	5.68188	-0.971464	G/C	0.45093	1.64562	2.14439	-0.86191	G/C	0.42747	3.731	4.03105	-0.611713
S3B_818513818	3B	818513818	A/G	0.34906	4.23958	6.23248	-0.971464	A/G	0.46262	0.181416	0.0796073	0.172268	A/G	0.33333	2.38959	2.35887	0.473464
S3B_818513872	3B	818513872	A/G	0.41321	3.59102	5.11967	-0.971464	A/G	0.4743	1.18225	1.39106	0.701933	A/G	0.41975	3.0073	3.11799	0.540876
S3B_818773941	3B	818773941	C/T	0.35472	3.93075	5.69959	-0.971464	C/T	0.47664	0.264312	0.150055	0.231324	C/T	0.35185	2.43366	2.4123	0.473296
S3B_818773949	3B	818773949	C/T	0.41132	3.84133	5.54631	-0.971464	C/T	0.35748	1.3137	1.59995	0.753644	C/T	0.41975	3.38024	3.58569	0.579863
S3B_818778328	3B	818778328	C/T	0.41321	4.03527	5.879	-0.971464	C/T	0.33411	1.3596	1.67386	0.768137	C/T	0.41975	3.55009	3.80072	0.593479
S3B_818778330	3B	818778330	A/G	0.41321	4.03527	5.879	-0.971464	A/G	0.25467	1.3596	1.67386	0.768137	A/G	0.41975	3.55009	3.80072	0.593479
S3B_818778355	3B	818778355	G/C	0.41321	4.03527	5.879	-0.971464	G/C	0.33411	1.3596	1.67386	-0.768137	G/C	0.41975	3.55009	3.80072	-0.593479
S3B_819742930	3B	819742930	G/C	0.19623	3.77559	5.43391	-0.971464	G/C	0.33411	1.73163	2.28879	-1.08362	G/C	0.20062	3.46748	3.69599	-0.694022
S3D_147687560	3D	147687560	T/C	0.11698	3.47073	4.91593	-0.971464	T/C	0.3271	0.722375	0.704267	0.843741	T/C	0.10494	2.56017	2.56633	0.836095
S4A_18114789	4A	18114789	T/C	0.10038	4.07935	5.9555	-0.149202	T/C	0.39486	0.530916	0.44892	-0.729207	T/C	0.09133	2.94051	3.03492	-0.821195
S4A_19821396	4A	19821396	G/A	0.11509	3.631	5.18757	-0.149202	G/A	0.40421	0.74047	0.729585	-0.906459	G/A	0.1034	2.67528	2.70731	-0.74171
S4A_19993648	4A	19993648	C/T	0.08302	3.71689	5.33377	-0.149202	C/T	0.28738	0.824297	0.849062	1.23855	C/T	0.07407	2.85147	2.92452	1.00656
S4A_709578189	4A	709578189	A/C	0.30989	4.70115	7.036	-0.149202	A/C	0.39252	0.751225	0.744716	-0.587884	A/C	0.3028	3.74718	4.05172	-0.738151
S4A_709578219	4A	709578219	A/G	0.30989	4.70115	7.036	-0.149202	A/G	0.31542	0.751225	0.744716	-0.587884	A/G	0.3028	3.74718	4.05172	-0.738151
S4B_416115213	4B	416115213	T/C	0.25283	3.002	4.13078	1.13158	T/C	0.39486	2.29071	3.25353	1.0702	T/C	0.24691	4.47486	4.9909	0.693996
S5A_19256360	5A	19256360	C/T	0.34151	0.978276	0.985253	0.120402	C/T	0.39486	3.63335	5.70275	-1.52895	C/T	0.33179	2.86184	2.93736	-0.578946
S5A_19256416	5A	19256416	G/C	0.3434	0.902429	0.88168	0.120402	G/C	0.39486	3.63335	5.70275	1.52895	G/C	0.33333	2.77835	2.83417	0.569963
S5B_40758976	5B	40758976	C/T	0.13585	3.51072	4.98357	0.327209	C/T	0.39486	0.204443	0.0976531	0.206418	C/T	0.12963	2.31637	2.2704	0.474966
S5B_621265933	5B	621265933	A/C	0.0625	0.741004	0.668602	-0.828762	A/C	0.17757	5.31695	8.96035	-3.29902	A/C	0.05418	3.64529	3.92177	-1.18963
S5B_621265934	5B	621265934	A/T	0.0625	0.741004	0.668602	-0.828762	A/T	0.10981	5.31695	8.96035	-3.29902	A/T	0.05418	3.64529	3.92177	-1.18963
S6B_102200443	6B	102200443	C/G	0.38068	2.18487	2.80105	-0.49379	C/G	0.11972	2.36964	3.39285	1.48052	C/G	0.38545	3.45087	3.67496	0.796151
S6B_454330230	6B	454330230	G/A	0.16288	1.31873	1.47062	-1.00537	G/A	0.37793	2.8274	4.21348	-1.62671	G/A	0.20279	3.88853	4.23265	-0.896701
S7A_664311815	7A	664311815	G/T	0.21321	2.72222	3.66934	0.553591	G/T	0.11972	2.62964	3.85643	2.10863	G/T	0.21605	3.6416	3.91706	1.12908
S7A_713758127	7A	713758127	C/T	0.41255	2.45531	3.23484	1.00468	C/T	0.04695	2.38551	3.42095	1.06595	C/T	0.4177	3.52186	3.7649	0.618026
S7A_713758436	7A	713758436	C/A	0.35606	2.41102	3.16334	0.996147	C/A	0.31308	2.87953	4.30818	1.19105	C/A	0.36378	4.1277	4.54048	0.686175
S7A_713834564	7A	713834564	A/C	0.36174	2.06664	2.61369	-0.901532	A/C	0.1986	2.88855	4.3246	-1.18835	A/C	0.36842	3.69449	3.98446	-0.640924
S7A_715781215	7A	715781215	A/C	0.38258	2.67562	3.59306	-1.0221	A/C	0.06776	2.32154	3.30786	-1.02129	A/C	0.3839	3.79937	4.11843	-0.629095
S7A_716611061	7A	716611061	G/T	0.36207	3.57655	5.09511	-1.22164	G/T	0.06776	1.56244	2.00593	-0.811386	G/T	0.36406	2.99066	3.09727	-0.556044
S7B_93328187	7B	93328187	G/A	0.19245	5.42597	8.3228	-0.0751805	G/A	0.09813	1.23079	1.46769	-0.98596	G/A	0.20525	4.24114	4.68721	-0.868981
S7B_418617539	7B	418617539	C/G	0.09434	0.421118	0.289089	-0.929942	C/G	0.13551	3.47831	5.41232	-3.72912	C/G	0.09259	2.43893	2.4187	-1.35479
S7B_486028804	7B	486028804	T/A	0.21132	1.86872	2.30355	-1.14626	T/A	0.07277	2.8383	4.23325	-1.59121	T/A	0.25309	3.46778	3.69636	-0.7942
S7B_515464182	7B	515464182	G/C	0.19811	2.95068	4.0457	-1.38712	G/C	0.09813	2.50389	3.63137	-1.36653	G/C	0.23148	3.83573	4.16497	-0.781133
S21_620713767	21	620713767	C/T	0.25758	3.12594	4.33698	1.95999	C/T	0.09813	1.89889	2.57296	1.62411	C/T	0.32353	3.4884	3.72248	1.06772
For variant column, the underlined indicate favorable alleles

## Sheet: TS4
				KW16			KW17			KW1617
MTA loci	SNP	Chromosme	Position	-log(P)	R2	Allelic Effects	-log(P)	R2	Allelic Effects	-log(P)	R2	Allelic Effects
QKWpur-1B.1	S1B_44851359	1B	44851359				3.83657	6.08605	2.57281	2.66746	2.6977	0.927147
QKWpur-1B.2	S1B_114608554	1B	114608554	4.45717	6.6106	-0.268427	ns	ns	ns	2.64	2.66402	0.55675
QKWpur-2A	S2A_600416078	2A	600416078				3.61847	5.6748	-2.63235
QKWpur-2B.1	S2A_16897947	2B	16897947	3.76845	5.42172	-0.971464				3.08389	3.21351	0.544673
QKWpur-2B.2	S2A_316307395	2B	316307395				3.52449	5.49865	-2.56758	2.66317	2.69244	-1.05959
QKWpur-2D.1	S2D_9581257	2D	9581257	3.73233	5.36008	-0.971464				2.02122	1.91762	0.431011
QKWpur-2D.2	S2D_82890831	2D	82890831				3.74183	5.907	-8.28161	3.04973	3.17088	-3.90653
QKWpur-2D.3	S2D_481961275	2D	481961275				3.6388	5.71299	6.5431	2.60705	2.62366	2.59015
QKWpur-2D.4	S2D_609315869	2D	609315869				3.72991	5.88451	-2.7925	3.06009	3.18379	-1.16482
QKWpur-3B.1	S3B_810549361	3B	810549361	4.03198	5.87381	-0.971464				3.40703	3.61953	0.906801
QKWpur-3B.2	S3B_817459692	3B	817459692	3.64174	5.20582	-0.971464				2.9408	3.03528	-0.541061
QKWpur-3B.3	S3B_818336557	3B	818336557	4.73518	7.0979	-0.971464				3.52215	3.76527	0.589847
QKWpur-3B.4	S3B_819742930	3B	819742930	3.77559	5.43391	-0.971464				3.46748	3.69599	-0.694022
QKWpur-4A.1	S4A_18114789	4A	18114789	4.07935	5.9555	-0.149202				2.94051	3.03492	-0.821195
QKWpur-4A.2	S4A_19993648	4A	19993648	3.71689	5.33377	-0.149202				2.85147	2.92452	1.00656
QKWpur-4A.3	S4A_709578189	4A	709578189	4.70115	7.036	-0.149202				3.74718	4.05172	-0.738151
QKWpur-4B	S4B_416115213	4B	416115213	3.002	4.13078	1.13158	2.29071	3.25353	1.0702	4.47486	4.9909	0.693996
QKWpur-5A	S5A_19256360	5A	19256360				3.63335	5.70275	-1.52895	2.86184	2.93736	-0.578946
QKWpur-5B.1	S5B_40758976	5B	40758976	3.51072	4.98357	0.327209				2.31637	2.2704	0.474966
QKWpur-5B.2	S5B_621265933	5B	621265933				5.31695	8.96035	-3.29902	3.64529	3.92177	-1.18963
QKWpur-6B	S6B_454330230	6B	454330230				2.8274	4.21348	-1.62671	3.88853	4.23265	-0.896701
QKWpur-7A.1	S7A_664311815	7A	664311815	2.72222	3.66934	0.553591	2.62964	3.85643	2.10863	3.6416	3.91706	1.12908
QKWpur-7A.2	S7A_713758436	7A	713758436	2.41102	3.16334	0.996147	2.87953	4.30818	1.19105	4.1277	4.54048	0.686175
QKWpur-7A.3	S7A_716611061	7A	716611061	3.57655	5.09511	-1.22164				2.99066	3.09727	-0.556044
QKWpur-7B.1	S7B_93328187	7B	93328187	5.42597	8.3228	-0.0751805				4.24114	4.68721	-0.868981
QKWpur-7B.2	S7B_515464182	7B	515464182	2.95068	4.0457	-1.38712	2.50389	3.63137	-1.36653	3.83573	4.16497	-0.781133

## Sheet: TS5
			KL16					KL17					KL1617
SNP	Chromosme	Position	Variants	MAF	-log(P)	R2	Allelic Effects	Variants	MAF	-log(P)	R2	Allelic Effects	Variants	MAF	-log(P)	R2	Allelic Effects
S1A_139973651	1A	139973651	G/A	0.201887	6.1	4.36871	0.163045	G/A	0.174419	0.432665	0.518069	-0.0456973	G/A	0.193498	1.475	1.69669	0.032596
S1A_139973659	1A	139973659	G/A	0.201887	6.1	4.36871	0.163045	G/A	0.174419	0.432665	0.518069	-0.0456973	G/A	0.193498	1.475	1.69669	0.032596
S1A_139973673	1A	139973673	T/C	0.201887	6.1	4.36871	0.163045	T/C	0.174419	0.432665	0.518069	-0.0456973	T/C	0.193498	1.475	1.69669	0.032596
S1A_139973679	1A	139973679	T/C	0.201887	6.1	4.36871	0.163045	T/C	0.174419	0.432665	0.518069	-0.0456973	T/C	0.193498	1.475	1.69669	0.032596
S1D_445262841	1D	445262841	T/C	0.435849	0.0841841	0.203957	-0.0154281	T/C	0.439535	5.73688	3.65253	-0.128683	T/C	0.43808	1.97363	2.13933	-0.0305654
S1D_445262848	1D	445262848	G/A	0.435849	0.0841841	0.203957	-0.0154281	G/A	0.439535	5.73688	3.65253	-0.128683	G/A	0.43808	1.97363	2.13933	-0.0305654
S2A_100650395	2A	100650395	A/T	0.341509	0.22005	0.366659	0.0324948	A/T	0.311628	5.8448	3.70989	0.178259	A/T	0.329721	2.38824	2.49784	0.0457153
S2A_719213278	2A	719213278	G/A	0.233962	0.733106	0.823357	-0.0460881	G/A	0.162791	6.07499	3.83183	-0.149692	G/A	0.201238	1.81604	2.00099	-0.0324728
S2A_719213280	2A	719213280	T/C	0.233962	0.733106	0.823357	-0.0460881	T/C	0.162791	6.07499	3.83183	-0.149692	T/C	0.201238	1.81604	2.00099	-0.0324728
S2B_153613233	2B	153613233	C/T	0.154717	0.472034	0.605671	-0.0436907	C/T	0.151163	5.65997	3.61158	-0.157432	C/T	0.159443	2.73966	2.79664	-0.0439973
S2B_423823799	2B	423823799	C/T	0.403774	4.70758	3.51019	-0.109599	C/T	0.381395	0.801491	0.791322	-0.0481651	C/T	0.385449	2.83065	2.87335	-0.0354082
S2D_228822944	2D	228822944	A/G	0.0320755	4.78804	3.56046	0.302774	A/G	0.027907	0.0322458	0.108763	-0.0285473	A/G	0.0340557	1.86883	2.04747	0.0798154
S2D_228822953	2D	228822953	A/C	0.0320755	4.78804	3.56046	0.302774	A/C	0.027907	0.0322458	0.108763	-0.0285473	A/C	0.0340557	1.86883	2.04747	0.0798154
S2D_631708051	2D	631708051	G/A	0.0735849	5.09842	3.75358	0.20964	G/A	0.0790698	0.922731	0.874994	0.0831855	G/A	0.0804954	3.00101	3.01634	0.0618047
S3A_593313534	3A	593313534	T/C	0.196226	4.90103	3.63092	-0.105214	T/C	0.130233	0.0152825	0.0724118	-0.00681612	T/C	0.185759	1.65239	1.85589	-0.0256836
S3A_700575251	3A	700575251	C/T	0.0471698	5.2448	3.84423	0.218221	C/T	0.0488372	0.779604	0.775972	0.0845858	C/T	0.0417957	3.68864	3.5859	0.079768
S3A_701892218	3A	701892218	T/A	0.090566	4.46195	3.35614	-0.173947	T/A	0.0953488	2.45563	1.83049	-0.128914	T/A	0.0851393	4.04375	3.87591	-0.0708778
S3A_702327328	3A	702327328	G/A	0.0509434	5.10476	3.75752	-0.209616	G/A	0.044186	1.38498	1.17857	-0.119438	G/A	0.0417957	4.03014	3.86484	-0.0850668
S3A_702562965	3A	702562965	C/T	0.0603774	5.05625	3.72742	0.193775	C/T	0.055814	2.69067	1.96788	0.155771	C/T	0.0526316	4.3357	4.11249	0.0807814
S3B_19394721	3B	19394721	T/C	0.0641509	0.543812	0.667527	-0.0626338	T/C	0.0674419	5.77917	3.67502	-0.204121	T/C	0.0557276	2.69212	2.75645	-0.0620564
S4D_12455323	4D	12455323	G/T	0.226415	0.335878	0.48205	0.0304142	G/T	0.151163	5.91361	3.7464	0.151752	G/T	0.193498	1.68312	1.88326	0.0308244
S6A_131449965	6A	131449965	G/C	0.296226	4.92041	3.64298	-0.124924	G/C	0.318605	0.0100326	0.0578434	-0.0056165	G/C	0.314241	1.41425	1.64165	-0.0277404
S16_131449971	16	131449971	A/G	0.29434	4.87574	3.61516	0.123872	A/G	0.313953	0.00865001	0.0534766	0.00527595	A/G	0.311146	1.39147	1.62094	0.027711
S16_131450018	16	131450018	G/C	0.296226	4.92041	3.64298	-0.124924	G/C	0.318605	0.0100326	0.0578434	-0.0056165	G/C	0.314241	1.41425	1.64165	-0.0277404
S6B_21459106	6B	21459106	C/T	0.124528	5.40312	3.94197	0.184968	C/T	0.118605	0.000830615	0.0159305	0.00224146	C/T	0.120743	1.34726	1.58062	0.0376593
S6B_21459109	6B	21459109	C/T	0.124528	5.40312	3.94197	0.184968	C/T	0.118605	0.000830615	0.0159305	0.00224146	C/T	0.120743	1.34726	1.58062	0.0376593
S6B_21459110	6B	21459110	G/A	0.126415	5.55806	4.03733	-0.186181	G/A	0.12093	4.03664e-05	0.00346315	-0.000490373	G/A	0.122291	1.36326	1.59523	-0.0376702
S6D_436639209	6D	436639209	G/A	0.132075	5.65206	4.09505	0.244328	G/A	0.0860465	0.892296	0.854192	0.11571	G/A	0.113003	3.78393	3.66397	0.0919423
S7A_60248641	7A	60248641	A/G	0.175472	0.777771	0.858936	0.0626285	A/G	0.17907	6.06421	3.82613	0.174851	A/G	0.176471	2.20543	2.34065	0.043562
S7A_672591452	7A	672591452	C/T	0.179245	4.50095	3.38066	0.133231	C/T	0.17907	1.04142	0.954989	0.068023	C/T	0.19195	4.34487	4.1199	0.0535914
S7A_672591453	7A	672591453	A/G	0.183019	5.25211	3.84875	0.144819	A/G	0.176744	1.06417	0.970137	0.0689329	A/G	0.19195	4.46485	4.21666	0.0542288
S7A_672591474	7A	672591474	C/G	0.179245	4.50095	3.38066	0.133231	C/G	0.17907	1.04142	0.954989	0.068023	C/G	0.19195	4.34487	4.1199	0.0535914
S7A_672591476	7A	672591476	T/C	0.179245	4.50095	3.38066	-0.133231	T/C	0.17907	1.04142	0.954989	-0.068023	T/C	0.19195	4.34487	4.1199	-0.0535914
S3A_691163936	7A	691163936	A/G	0.356604	2.21726	1.89652	0.0692876	A/G	0.367442	1.98772	1.55173	0.0663575	A/G	0.346749	3.58784	3.5031	0.0372403
S7B_111946296	7B	111946296	T/C	0.237736	3.79335	2.93214	-0.101745	T/C	0.190698	1.84885	1.46738	-0.0823466	T/C	0.226006	4.50472	4.24876	-0.0481402
S7B_112634218	7B	112634218	A/G	0.233962	3.40122	2.67985	0.0973637	A/G	0.183721	1.2077	1.0645	0.067983	A/G	0.221362	3.92621	3.7802	0.045568
S7B_113197896	7B	113197896	T/C	0.235849	3.81279	2.94457	-0.102435	T/C	0.183721	2.22435	1.69366	-0.0921786	T/C	0.221362	4.83329	4.51225	-0.0504162
S7B_113442605	7B	113442605	G/A	0.237736	3.79335	2.93214	-0.101745	G/A	0.186047	1.91324	1.50659	-0.0850204	G/A	0.22291	4.68466	4.39328	-0.0494792
S7B_113572123	7B	113572123	G/A	0.237736	3.53997	2.76945	-0.0980711	G/A	0.183721	1.87739	1.48479	-0.0837358	G/A	0.22291	4.40467	4.16816	-0.047848
S7B_114422330	7B	114422330	G/A	0.25283	4.30487	3.25717	-0.106149	G/A	0.211628	0.843859	0.820813	-0.0532808	G/A	0.243034	3.76213	3.64613	-0.0428397
S7B_115377252	7B	115377252	G/T	0.250943	4.33355	3.27527	0.108433	G/T	0.202326	1.06086	0.967939	0.0620632	G/T	0.239938	3.82811	3.70011	0.0439477
S7B_611962767	7B	611962767	G/A	0.10566	2.99686	2.41638	-0.122275	G/A	0.0906977	1.22951	1.07867	-0.0870302	G/A	0.0913313	4.21977	4.01874	-0.0662947
S7D_34052488	7D	34052488	C/A	0.10566	0.461392	0.596333	-0.0529175	C/A	0.106977	5.51009	3.53158	0.208588	C/A	0.0959752	0.304767	0.538975	0.0191892
S7D_612285263	7D	612285263	C/T	0.139623	5.40208	3.94133	-0.135275	C/T	0.0697674	0.12304	0.234527	-0.0348765	C/T	0.0773994	1.98638	2.15046	-0.0582766
S7D_612285300	7D	612285300	G/A	0.139623	5.40208	3.94133	0.135275	G/A	0.0697674	0.12304	0.234527	0.0348765	G/A	0.0773994	1.98638	2.15046	0.0582766
For variant column, the underlined indicate favorable alleles

## Sheet: TS6
				KL16			KL17			KL1617
MTA loci	SNP	Chromosme	Position	-log(P)	R2	Allelic Effects	-log(P)	R2	Allelic Effects	-log(P)	R2	Allelic Effects
QKLpur-1A	S1A_139973651	1A	139973651	4.36871	6.1	0.163045
QKLpur-1D	S2D_445262841	1D	445262841				3.65253	5.73688	-0.128683
QKLpur-2A.1	S2A_100650395	2A	100650395				3.70989	5.8448	0.178259
QKLpur-2A.2	S2A_719213278	2A	719213278				3.83183	6.07499	-0.149692
QKLpur-2B.1	S2B_153613233	2B	153613233				3.61158	5.65997	-0.157432
QKLpur-2B.2	S2B_423823799	2B	423823799	3.51019	4.70758	-0.109599
QKLpur-2D.1	S2D_228822944	2D	228822944	3.56046	4.78804	0.302774
QKLpur-2D.2	S2D_631708051	2D	631708051	3.75358	5.09842	0.20964
QKLpur-3A.1	S3A_593313534	3A	593313534	3.63092	4.90103	-0.105214
QKLpur-3A.2	S3A_700575251	3A	700575251	3.84423	5.2448	0.218221				3.5859	3.68864	0.079768
QKLpur-3A.3	S3A_702562965	3A	702562965	3.72742	5.05625	0.193775				4.11249	4.3357	0.0807814
QKLpur-3B	S3B_19394721	3B	19394721				3.67502	5.77917	-0.204121
QKLpur-4D	S4D_12455323	4D	12455323				3.7464	5.91361	0.151752
QKLpur-6A	S6A_131449965	6A	131449965	3.64298	4.92041	-0.124924
QKLpur-6B	S6B_21459106	6B	21459106	3.94197	5.40312	0.184968
QKLpur-6D	S6D_436639209	6D	436639209	4.09505	5.65206	0.244328				3.66397	3.78393	0.0919423
QKLpur-7A.1	S7A_60248641	7A	60248641				3.82613	6.06421	0.174851
QKLpur-7A.2	S7A_672591452	7A	672591452							4.1199	4.34487	0.0535914
QKLpur-7A.3	S7A_691163936	7A	691163936							3.5031	3.58784	0.0372403
QKLpur-7B.1	S7B_111946296	7B	111946296							4.24876	4.50472	-0.0481402
QKLpur-7B.2	S7B_112634218	7B	112634218							3.7802	3.92621	0.045568
QKLpur-7B.3	S7B_113197896	7B	113197896							4.51225	4.83329	-0.0504162
QKLpur-7B.4	S7B_114422330	7B	114422330							3.64613	3.76213	-0.0428397
QKLpur-7B.5	S7B_115377252	7B	115377252							3.70011	3.82811	0.0439477
QKLpur-7B.6	S7B_611962767	7B	611962767							4.01874	4.21977	-0.0662947
QKLpur-7D.1	S7D_34052488	7B	34052488				3.53158	5.51009	0.208588
QKLpur-7D.2	S7D_612285263	7B	612285263	3.94133	5.40208	-0.135275

## Sheet: TS7
MTA Loci	SNP	Position	Chromosome	Gene_start	Gene_end	Gene_ID	Blast-Hit-Accession	Human-Readable-Description
QKWpur-1B.1	S1B_44851359	44851359	1B	44799607	44801180	TraesCS1B01G060800	tr|A0A061FC92|A0A061FC92_THECC	Alpha/beta-Hydrolases superfamily protein
QKWpur-1B.2	S1B_114608554	114608554	1B	114686573	114687445	TraesCS1B01G104200	tr|W5AAA5|W5AAA5_WHEAT	Phosphoglycerate kinase
			1B	114691532	114691985	TraesCS1B01G104300	sp|A0A059UI21|KA263_MESGB	Potassium channel toxin alpha-KTx 26.3
	S2A_4013484	4013484	2A	3767197	3767967	TraesCS2A01G009200	AT4G10200.2	TTF-type zinc finger protein with HAT dimerization domain-containing protein
			2A	3794470	3797034	TraesCS2A01G009300	tr|A0A1E5W014|A0A1E5W014_9POAL	Pentatricopeptide repeat-containing protein
			2A	3797474	3800866	TraesCS2A01G009400	tr|B9SBD0|B9SBD0_RICCO	Arginine/serine-rich splicing factor, putative
			2A	3816524	3817960	TraesCS2A01G009500	tr|A0A1D5TJP9|A0A1D5TJP9_WHEAT	Glycosyltransferase
			2A	3834321	3844562	TraesCS2A01G009600	tr|G7ILW5|G7ILW5_MEDTR	ABC transporter B family-like protein
			2A	3848784	3857006	TraesCS2A01G009700	tr|G7ILW5|G7ILW5_MEDTR	ABC transporter B family-like protein
			2A	3863119	3865016	TraesCS2A01G009800	tr|W0FG45|W0FG45_POPTR	Cytochrome P450
			2A	3905386	3930750	TraesCS2A01G009900	tr|G7ILW5|G7ILW5_MEDTR	ABC transporter B family-like protein
			2A	3954639	3955945	TraesCS2A01G010000	tr|D3GC10|D3GC10_JATCU	Avr9/Cf-9 rapidly elicited protein
			2A	3959490	3962611	TraesCS2A01G010100	tr|A0A1D5TM13|A0A1D5TM13_WHEAT	Pyruvate dehydrogenase E1 component subunit alpha
			2A	3964870	3967583	TraesCS2A01G010200	tr|T2DNH6|T2DNH6_PHAVU	StAR-related lipid transfer protein
			2A	4037732	4041073	TraesCS2A01G010300	tr|A0A061FG24|A0A061FG24_THECC	Receptor protein kinase, putative
			2A	4042748	4044634	TraesCS2A01G010400	tr|A0A061FY57|A0A061FY57_THECC	Leucine-rich repeat receptor-like protein kinase family protein, putative
			2A	4046474	4047655	TraesCS2A01G010500	tr|I7DDP7|I7DDP7_BRARO	Leucine-rich repeat receptor-like kinase
			2A	4083913	4089201	TraesCS2A01G010600	tr|A0A199VG66|A0A199VG66_ANACO	Mediator of RNA polymerase II transcription subunit 15a
			2A	4092381	4093826	TraesCS2A01G010700	tr|A0A0U1WYL4|A0A0U1WYL4_ORYGL	Cytochrome P450
			2A	4113715	4114311	TraesCS2A01G010800	AT3G14880.2	transcription factor-like protein
			2A	4137837	4141696	TraesCS2A01G010900	tr|Q53QJ2|Q53QJ2_ORYSJ	Agenet domain, putative
			2A	4161142	4165096	TraesCS2A01G011000	tr|A3FBG3|A3FBG3_WHEAT	WRKY transcription factor
			2A	4168242	4171742	TraesCS2A01G011100	tr|M7ZN56|M7ZN56_TRIUA	TOM1-like protein 2
			2A	4180242	4182446	TraesCS2A01G011200	AT5G45540.1	transmembrane protein, putative (DUF594)
			2A	4212535	4213662	TraesCS2A01G011300	tr|G7LIM9|G7LIM9_MEDTR	DUF1644 family protein
			2A	4215829	4221327	TraesCS2A01G011400	tr|F4JDC3|F4JDC3_ARATH	Evolutionarily conserved C-terminal region 2
QKWpur-2A	S2A_600416078	600416078	2A	600528624	600530098	TraesCS2A01G356200	tr|W9QLB4|W9QLB4_9ROSA	BTB/POZ domain-containing protein
	S2A_602118121	602118121	2A	602114682	602118106	TraesCS2A01G357500	tr|W9RLK8|W9RLK8_9ROSA	Calcium uptake protein 1
			2A	602121917	602125322	TraesCS2A01G357600	tr|Q8H5Q5|Q8H5Q5_ORYSJ	Organic solute transporter-like
			2A	602128755	602135126	TraesCS2A01G357700	AT4G23840.1	Leucine-rich repeat (LRR) family protein
	S2B_16897947	16897947	2B	16768877	16770805	TraesCS2B01G034000	sp|P93194|RPK1_IPONI	Receptor-like protein kinase
			2B	16772255	16773262	TraesCS2B01G034100	tr|M8ANS6|M8ANS6_TRIUA	Glycosyltransferase
			2B	16814595	16816232	TraesCS2B01G034200	sp|P93194|RPK1_IPONI	Receptor-like protein kinase
			2B	16826352	16828277	TraesCS2B01G034300	AT1G65790.1	receptor kinase 1
			2B	16828813	16829345	TraesCS2B01G034400	tr|A0A060AJT9|A0A060AJT9_WHEAT	Defensin
			2B	16847680	16848057	TraesCS2B01G034500	tr|A0A060AJT9|A0A060AJT9_WHEAT	Defensin
			2B	16855696	16857660	TraesCS2B01G034600	AT1G65790.1	receptor kinase 1
			2B	16869290	16871449	TraesCS2B01G034700	AT1G65790.1	receptor kinase 1
			2B	16891749	16893837	TraesCS2B01G034800	tr|M8ANY8|M8ANY8_AEGTA	GDSL esterase/lipase
			2B	16895892	16898314	TraesCS2B01G034900	tr|Q70T29|Q70T29_BIXOR	Carboxyl methyltransferase
			2B	16905748	16907712	TraesCS2B01G035000	tr|B9S365|B9S365_RICCO	Protein kinase, putative
			2B	16959060	16960707	TraesCS2B01G035100	tr|M8B6K9|M8B6K9_AEGTA	Disease resistance protein RPM1
			2B	16969056	16970817	TraesCS2B01G035200	tr|A0A0B0MGQ5|A0A0B0MGQ5_GOSAR	Glutamyl-tRNA (Gln) amidotransferase subunit A
			2B	16989190	16991584	TraesCS2B01G035300	AT1G65790.1	receptor kinase 1
			2B	17023741	17026636	TraesCS2B01G035400	AT1G65790.1	receptor kinase 1
			2B	17039810	17041867	TraesCS2B01G035500	tr|A0A1E5W6Y0|A0A1E5W6Y0_9POAL	Protein UPSTREAM OF FLC
			2B	17110603	17112087	TraesCS2B01G035600	tr|A0A0U1WYL4|A0A0U1WYL4_ORYGL	Cytochrome P450
			2B	17144067	17150444	TraesCS2B01G035700	tr|A0A0U1WYL4|A0A0U1WYL4_ORYGL	Cytochrome P450
QKWpur-2D.1	S2D_9581257	9581257	2D	9371494	9373126	TraesCS2D01G019400	AT3G14470.2	NB-ARC domain-containing disease resistance protein
			2D	9380447	9381907	TraesCS2D01G019500	AT3G14470.2	NB-ARC domain-containing disease resistance protein
			2D	9393373	9402258	TraesCS2D01G019600	AT1G65790.1	receptor kinase 1
			2D	9502978	9503700	TraesCS2D01G019700	AT3G46730.1	NB-ARC domain-containing disease resistance protein
			2D	9575302	9576786	TraesCS2D01G019800	tr|R7W251|R7W251_AEGTA	Receptor-like protein kinase
			2D	9588297	9589869	TraesCS2D01G019900	AT3G14470.2	NB-ARC domain-containing disease resistance protein
			2D	9604748	9606229	TraesCS2D01G020000	AT3G14470.2	NB-ARC domain-containing disease resistance protein
			2D	9625689	9629236	TraesCS2D01G020100	tr|B9RX67|B9RX67_RICCO	Kinase, putative
			2D	9635435	9638958	TraesCS2D01G020200	tr|B9U140|B9U140_LOLPR	Apyrase
			2D	9642976	9644466	TraesCS2D01G020300	AT3G14470.2	NB-ARC domain-containing disease resistance protein
			2D	9663778	9665250	TraesCS2D01G020400	AT3G14470.2	NB-ARC domain-containing disease resistance protein
			2D	9738676	9739155	TraesCS2D01G020500	tr|E7CWB4|E7CWB4_WHEAT	Cytochrome P450
			2D	9751731	9753206	TraesCS2D01G020600	tr|N1R0R0|N1R0R0_AEGTA	Disease resistance protein RGA2
			2D	9757080	9758495	TraesCS2D01G020700	tr|A0A0U2S1G4|A0A0U2S1G4_ORYSA	NBS-LRR-like resistance protein
			2D	9785294	9785488	TraesCS2D01G020800	tr|E9KJE7|E9KJE7_9POAL	Photosystem II reaction center protein K
			2D	9785879	9785989	TraesCS2D01G020900	tr|A0A193DRU6|A0A193DRU6_LIRCH	Photosystem II reaction center protein I
			2D	9787218	9788279	TraesCS2D01G021000	tr|K4P9X7|K4P9X7_9POAL	Photosystem II D2 protein
QKWpur-2D.2	S2D_82890831	82890831	2D	82653654	82660323	TraesCS2D01G140300	tr|A0A061ET59|A0A061ET59_THECC	ARM repeat superfamily protein
			2D	82834476	82834880	TraesCS2D01G140400	tr|Q9M8J7|Q9M8J7_ARATH	ARM repeat superfamily protein
			2D	82835064	82837283	TraesCS2D01G140500	tr|A0A061ET59|A0A061ET59_THECC	ARM repeat superfamily protein
			2D	82872069	82883261	TraesCS2D01G140600	AT5G18980.1	ARM repeat superfamily protein
			2D	82891360	82902311	TraesCS2D01G140700	tr|A0A061ET59|A0A061ET59_THECC	ARM repeat superfamily protein
			2D	83049993	83050922	TraesCS2D01G140800	tr|B9SG28|B9SG28_RICCO	Indole-3-acetic acid-amido synthetase GH3.3, putative
			2D	83100699	83103438	TraesCS2D01G140900	tr|M9QX03|M9QX03_ORYSI	Terpene synthase
			2D	83128013	83131335	TraesCS2D01G141000	tr|A0A0K9P197|A0A0K9P197_ZOSMR	ATP-dependent RNA helicase
			2D	83131777	83136618	TraesCS2D01G141100	AT1G63900.1	E3 Ubiquitin ligase family protein
			2D	83137510	83140567	TraesCS2D01G141200	tr|A0A072TE22|A0A072TE22_MEDTR	Myb/SANT-like DNA-binding domain protein
QKWpur-2D.3	S2D_481961275	481961275	2D	481961489	481963746	TraesCS2D01G377500	tr|A0A096UMG0|A0A096UMG0_WHEAT	Phenylalanine ammonia-lyase
			2D	481988410	481990655	TraesCS2D01G377600	tr|A0A096UMG0|A0A096UMG0_WHEAT	Phenylalanine ammonia-lyase
			2D	482174234	482175310	TraesCS2D01G377700	tr|G7J059|G7J059_MEDTR	Glucuronoxylan 4-O-methyltransferase
QKWpur-2D.4	S2D_609315869	609315869	2D	609236658	609238747	TraesCS2D01G519300	tr|A7UMA9|A7UMA9_WHEAT	CsAtPR5
			2D	609297211	609315232	TraesCS2D01G519400	tr|F4ISL5|F4ISL5_ARATH	SPOC domain / transcription elongation factor S-II protein
			2D	609419916	609423671	TraesCS2D01G519500	tr|Q710Q1|Q710Q1_ORYSA	Alpha/beta hydrolase
			2D	609425079	609425471	TraesCS2D01G519600	tr|B9RD77|B9RD77_RICCO	14 kDa proline-rich protein DC2.15, putative
			2D	609431617	609432519	TraesCS2D01G519700	tr|Q5YJQ7|Q5YJQ7_HYAOR	Protease inhibitor/seed storage/lipid transfer protein
			2D	609433635	609439705	TraesCS2D01G519800	tr|A0A199W9I1|A0A199W9I1_ANACO	NEDD8 ultimate buster 1
			2D	609435210	609435877	TraesCS2D01G519900	tr|B5TQZ3|B5TQZ3_WHEAT	Pectin methylesterase inhibitor
			2D	609479807	609486651	TraesCS2D01G520000	tr|A0A059LGJ3|A0A059LGJ3_9CHLO	Thymidylate synthase
			2D	609487472	609489731	TraesCS2D01G520100	tr|A0A1E5WJU9|A0A1E5WJU9_9POAL	Autophagy-related protein 101
			2D	609492585	609493904	TraesCS2D01G520200	tr|A0A124SCG9|A0A124SCG9_CYNCS	Harbinger transposase-derived nuclease
			2D	609515156	609515782	TraesCS2D01G520300	AT1G15760.1	Sterile alpha motif (SAM) domain-containing protein
QKWpur-2D.4	S2D_609315869	609315869	2D	609552423	609553198	TraesCS2D01G520400	tr|M8CSX4|M8CSX4_AEGTA	Pentatricopeptide repeat-containing protein
	S3A_460891597	460891597	3A	460811425	460824851	TraesCS3A01G245700	tr|A0A072UNU6|A0A072UNU6_MEDTR	Homeodomain transcriptional regulator
	S3B_810415758	810415758	3B	810250564	810253150	TraesCS3B01G581500	sp|Q8X092|ALG11_NEUCR	GDP-Man:Man(3)GlcNAc(2)-PP-Dol alpha-1,2-mannosyltransferase
	S3B_810463924	810463924	3B	810267527	810270844	TraesCS3B01G581600	tr|Q9FHX1|Q9FHX1_ARATH	Regulator of chromosome condensation (RCC1) family with FYVE zinc finger domain
	S3B_810538925	810538925	3B	810272132	810273854	TraesCS3B01G581700	tr|Q5JJW1|Q5JJW1_ORYSJ	Mitochondrial carrier protein-like
	S3B_810543063	810543063	3B	810274098	810284924	TraesCS3B01G581800	tr|M8C0F8|M8C0F8_AEGTA	DNA-directed RNA polymerase subunit
	S3B_810544765	810544765	3B	810325719	810329076	TraesCS3B01G581900	tr|B4FSB1|B4FSB1_MAIZE	Uridylate kinase
QKWpur-3B.1	S3B_810549361	810549361	3B	810334070	810336323	TraesCS3B01G582000	tr|W9R8G9|W9R8G9_9ROSA	Histone-lysine N-methyltransferase
	S3B_810611280	810611280	3B	810450715	810455082	TraesCS3B01G582100	tr|Q9ZT24|Q9ZT24_MAIZE	Pol polyprotein
	S3B_810656139	810656139	3B	810472321	810472533	TraesCS3B01G582200	sp|A0LEQ2|NUOH1_SYNFM	NADH-quinone oxidoreductase subunit H 1
	S3B_810657366	810657366	3B	810482370	810482582	TraesCS3B01G582300	sp|A0LEQ2|NUOH1_SYNFM	NADH-quinone oxidoreductase subunit H 1
	S3B_810902026	810902026	3B	810528879	810537266	TraesCS3B01G582400	tr|R7W0U9|R7W0U9_AEGTA	General transcription factor IIE subunit 1
	S3B_815282961	815282961	3B	810561114	810563773	TraesCS3B01G582500	tr|M8A595|M8A595_TRIUA	Growth inhibition and differentiation-related protein 88-like protein
QKWpur-3B.2	S3B_817459692	817459692	3B	810621428	810625234	TraesCS3B01G582600	tr|O65815|O65815_HELTU	Cytochrome P450
	S3B_818316042	818316042	3B	810653140	810654320	TraesCS3B01G582700	tr|O04163|O04163_NEPRA	Cytochrome P450
	S3B_818336545	818336545	3B	810655364	810660111	TraesCS3B01G582800	tr|A0A072VQ30|A0A072VQ30_MEDTR	RING/FYVE/PHD zinc finger protein, putative
	S3B_818336846	818336846	3B	810935574	810936125	TraesCS3B01G582900	AT1G11400.6	partner of Y14-MAGO
	S3B_818353805	818353805	3B	810948315	810954181	TraesCS3B01G583000	AT4G13985.1	FBD-associated F-box protein
	S3B_818442459	818442459	3B	810969702	810972060	TraesCS3B01G583100	AT4G13985.1	FBD-associated F-box protein
	S3B_818513818	818513818	3B	810978143	810979630	TraesCS3B01G583200	tr|A0A1J3JQY5|A0A1J3JQY5_NOCCA	FBD-associated F-box protein
	S3B_818773941	818773941	3B	811040983	811042575	TraesCS3B01G583300	tr|A0A1J3JQY5|A0A1J3JQY5_NOCCA	FBD-associated F-box protein
	S3B_818778328	818778328	3B	811044619	811055158	TraesCS3B01G583400	AT4G13985.1	FBD-associated F-box protein
QKWpur-3B.4	S3B_819742930	819742930	3B	811078670	811081513	TraesCS3B01G583500	AT4G13985.1	FBD-associated F-box protein
			3B	811093588	811096317	TraesCS3B01G583600	tr|M8BUC4|M8BUC4_AEGTA	Glutamate decarboxylase
			3B	811111055	811113659	TraesCS3B01G583700	AT4G13985.1	FBD-associated F-box protein
			3B	811133871	811136453	TraesCS3B01G583800	tr|A0A1J3JQY5|A0A1J3JQY5_NOCCA	FBD-associated F-box protein
			3B	811139633	811140993	TraesCS3B01G583900	tr|A0A1J3JQY5|A0A1J3JQY5_NOCCA	FBD-associated F-box protein
			3B	811151992	811153411	TraesCS3B01G584000	AT4G13985.1	FBD-associated F-box protein
			3B	815044832	815053481	TraesCS3B01G589800	tr|C1K3M2|C1K3M2_WHEAT	Pm3-like disease resistance protein
			3B	815198484	815201046	TraesCS3B01G589900	tr|B6TM56|B6TM56_MAIZE	Chloroplast outer envelope 24 kD protein
			3B	815203137	815206826	TraesCS3B01G590000	tr|B4FUF3|B4FUF3_MAIZE	Bifunctional polymyxin resistance arnA protein
			3B	815282488	815283645	TraesCS3B01G590100	AT3G25750.2	F-box SKIP23-like protein (DUF295)
			3B	815319650	815325498	TraesCS3B01G590200	tr|A0A151QNJ8|A0A151QNJ8_CAJCA	Gag polyprotein
			3B	815357291	815359177	TraesCS3B01G590300	sp|O60016|CLR4_SCHPO	Histone-lysine N-methyltransferase, H3 lysine-9 specific
			3B	815382085	815390894	TraesCS3B01G590400	tr|G7KTI5|G7KTI5_MEDTR	Villin
			3B	815476561	815480015	TraesCS3B01G590500	AT1G65790.1	receptor kinase 1
			3B	815509411	815524514	TraesCS3B01G590600	tr|A0A089WZJ3|A0A089WZJ3_ORYNI	NBS-LRR disease resistance protein
			3B	817258891	817259769	TraesCS3B01G593600	AT3G16210.1	F-box family protein
			3B	817331244	817332167	TraesCS3B01G593700	AT5G02600.2	Heavy metal transport/detoxification superfamily protein
			3B	817351847	817353612	TraesCS3B01G593800	tr|M8BD39|M8BD39_AEGTA	11S globulin seed storage protein 2
			3B	817408885	817413936	TraesCS3B01G593900	tr|Q9LG50|Q9LG50_ORYSJ	NBS-LRR disease resistance protein-like
			3B	817466250	817466602	TraesCS3B01G594000	AT2G27145.1	low-molecular-weight cysteine-rich 9
			3B	817514006	817515388	TraesCS3B01G594100	sp|P31821|GAG_FIVT2	Gag polyprotein
			3B	817517653	817524674	TraesCS3B01G594200	tr|A0A199VX64|A0A199VX64_ANACO	Ninja-family protein
			3B	817577365	817578228	TraesCS3B01G594300	tr|W9RUI2|W9RUI2_9ROSA	Two-component response regulator
			3B	818138695	818140554	TraesCS3B01G594900	tr|Q8SMH7|Q8SMH7_PERAE	RNA-binding protein
			3B	818157351	818158703	TraesCS3B01G595000	tr|G7IWM5|G7IWM5_MEDTR	F-box protein
			3B	818272147	818273461	TraesCS3B01G595100	tr|B9S3H1|B9S3H1_RICCO	Zinc transporter, putative
			3B	818275851	818277457	TraesCS3B01G595200	tr|A0A0K9NMJ4|A0A0K9NMJ4_ZOSMR	RING/U-box superfamily protein
			3B	818290019	818294508	TraesCS3B01G595300	sp|P0CY97|CH601_PROAC	60 kDa chaperonin 1
			3B	818314312	818317058	TraesCS3B01G595400	tr|Q5Z570|Q5Z570_ORYSJ	Embryogenesis transmembrane protein-like
			3B	818441522	818444036	TraesCS3B01G595500	tr|B5RHV5|B5RHV5_MUSBA	Protein kinase family protein
			3B	818749122	818752247	TraesCS3B01G595600	tr|B9T001|B9T001_RICCO	WD-repeat protein, putative
			3B	818785742	818786905	TraesCS3B01G595700	tr|A0A103YHS3|A0A103YHS3_CYNCS	Transcription factor, MADS-box
			3B	818847773	818849911	TraesCS3B01G595800	tr|B4F802|B4F802_MAIZE	WRKY transcription factor
			3B	818874817	818876454	TraesCS3B01G595900	AT4G24190.2	Chaperone protein htpG family protein
			3B	818926046	818926870	TraesCS3B01G596000	tr|G7KGR6|G7KGR6_MEDTR	Rotundifolia-like protein
			3B	819502902	819507260	TraesCS3B01G596700	sp|P93194|RPK1_IPONI	Receptor-like protein kinase
			3B	819522398	819524244	TraesCS3B01G596800	tr|B8XSN0|B8XSN0_WHEAT	Cytochrome P450
			3B	819629205	819634842	TraesCS3B01G596900	sp|P93194|RPK1_IPONI	Receptor-like protein kinase
			3B	819650047	819652336	TraesCS3B01G597000	tr|B8XSN0|B8XSN0_WHEAT	Cytochrome P450
			3B	819704491	819705396	TraesCS3B01G597100	sp|A4YBE7|PCKA_SHEPC	Phosphoenolpyruvate carboxykinase (ATP)
			3B	819740077	819742120	TraesCS3B01G597200	tr|B8XSN0|B8XSN0_WHEAT	Cytochrome P450
			3B	819750522	819751035	TraesCS3B01G597300	tr|Q9S7C6|Q9S7C6_MAIZE	Ae3
			3B	819785500	819787755	TraesCS3B01G597400	tr|A0A199VVE7|A0A199VVE7_ANACO	Pentatricopeptide repeat-containing protein
			3B	819788128	819792885	TraesCS3B01G597500	tr|B9HPG4|B9HPG4_POPTR	Telomere-binding family protein
			3B	819809430	819811957	TraesCS3B01G597600	tr|A0A061H018|A0A061H018_THECC	Rab5-interacting family protein
			3B	819854349	819861990	TraesCS3B01G597700	tr|Q10ND1|Q10ND1_ORYSJ	Haloacid dehalogenase-like hydrolase family protein, putative, expressed
			3B	819896710	819901740	TraesCS3B01G597800	tr|M8BUH1|M8BUH1_AEGTA	Vacuolar-processing enzyme
			3B	819930084	819934420	TraesCS3B01G597900	tr|N1QUA0|N1QUA0_AEGTA	Vacuolar-processing enzyme
			3B	819948218	819949585	TraesCS3B01G598000	AT3G23955.1	F-box family protein
			3B	819955611	819957036	TraesCS3B01G598100	tr|A0A080YUL9|A0A080YUL9_WHEAT	Pectinesterase
			3B	819990507	819991952	TraesCS3B01G598200	tr|A0A080YUM0|A0A080YUM0_WHEAT	Glycosyltransferase
	S3D_147687560	147687560	3D	143144505	143148152	TraesCS3D01G168600	tr|Q40568|Q40568_TOBAC	Phosphate translocator
			3D	147461001	147461738	TraesCS3D01G169500	tr|U3RBI7|U3RBI7_CUCSA	Glutaredoxin
			3D	147817873	147821157	TraesCS3D01G169600	tr|W9R0H2|W9R0H2_9ROSA	Leucine--tRNA ligase
			3D	147823546	147828322	TraesCS3D01G169700	tr|M0YF26|M0YF26_HORVV	tRNA(His) guanylyltransferase
			3D	147829131	147834416	TraesCS3D01G169800	AT2G28130.1	actin protein 2/3 complex subunit-like protein
			3D	147835530	147836894	TraesCS3D01G169900	AT2G42760.1	DUF1685 family protein
QKWpur-4A.1	S4A_18114789	18114789	4A	17887880	17888485	TraesCS4A01G026000	tr|M8B238|M8B238_TRIUA	Werner Syndrome-like exonuclease
			4A	17897642	17898495	TraesCS4A01G026100	AT1G65790.1	receptor kinase 1
			4A	18018162	18020318	TraesCS4A01G026200	tr|A0A1D5XCZ0|A0A1D5XCZ0_WHEAT	Serine/threonine-protein kinase
			4A	18116285	18123914	TraesCS4A01G026300	AT1G65790.1	receptor kinase 1
			4A	18141100	18141631	TraesCS4A01G026400	sp|Q9NG98|TOP3A_DROME	DNA topoisomerase 3-alpha
			4A	18146105	18146737	TraesCS4A01G026500	AT5G51660.4	cleavage and polyadenylation specificity factor 160
			4A	18266944	18268924	TraesCS4A01G026600	AT1G65790.1	receptor kinase 1
			4A	18271858	18272388	TraesCS4A01G026700	AT5G38250.1	Protein kinase family protein
			4A	18301884	18303814	TraesCS4A01G026800	AT3G50130.1	transmembrane protein, putative (DUF247)
	S4A_19821396	19821396	4A	19620363	19622625	TraesCS4A01G027700	tr|A0A076L230|A0A076L230_GOSHI	Heat shock transcription factor
QKWpur-4A.2	S4A_19993648	19993648	4A	19626280	19628912	TraesCS4A01G027800	tr|W5E8D7|W5E8D7_WHEAT	1,2-dihydroxy-3-keto-5-methylthiopentene dioxygenase
			4A	19642591	19643395	TraesCS4A01G027900	AT2G46460.1	Polynucleotidyl transferase, ribonuclease H-like superfamily protein
			4A	19658559	19660099	TraesCS4A01G028000	tr|M7Y8W3|M7Y8W3_TRIUA	Pectinesterase
			4A	19945891	19958004	TraesCS4A01G028100	tr|Q5PSQ4|Q5PSQ4_9POAL	MADS box transcription factor
			4A	19991318	20006652	TraesCS4A01G028200	tr|Q5PSQ4|Q5PSQ4_9POAL	MADS box transcription factor
QKWpur-4A.3	S4A_709578189	709578189	4A	709418326	709422229	TraesCS4A01G440500	tr|A0A1J6KXT5|A0A1J6KXT5_NICAT	Protein nrt1 ptr family 1.2
			4A	709612443	709616324	TraesCS4A01G440600	tr|A0A1J6KXT5|A0A1J6KXT5_NICAT	Protein nrt1 ptr family 1.2
			4A	709716334	709720574	TraesCS4A01G440700	tr|A0A1J6K5A9|A0A1J6K5A9_NICAT	Protein nrt1 ptr family 1.2
QKWpur-4B	S4B_416115213	416115213	4B	416105623	416106375	TraesCS4B01G192800	tr|A0A060CXU7|A0A060CXU7_MAIZE	Trihelix transcription factor
			4B	416151157	416152415	TraesCS4B01G192900	tr|F2DED3|F2DED3_HORVV	DNA topoisomerase
			4B	416153266	416161940	TraesCS4B01G193000	tr|A0A199VBX3|A0A199VBX3_ANACO	6-phosphofructo-2-kinase/fructose-2, 6-bisphosphatase
			4B	416163921	416166130	TraesCS4B01G193100	tr|A0A1E5VXL4|A0A1E5VXL4_9POAL	Protein CHUP1, chloroplastic
			4B	416303829	416306427	TraesCS4B01G193200	tr|Q8S4W9|Q8S4W9_MAIZE	Pyruvate decarboxylase
QKWpur-5A	S5A_19256360	19256360	5A	19067238	19068938	TraesCS5A01G024300	tr|A0A072U799|A0A072U799_MEDTR	Cation calcium exchanger
			5A	19105367	19108318	TraesCS5A01G024400	AT4G08850.1	Leucine-rich repeat receptor-like protein kinase family protein
			5A	19223415	19227300	TraesCS5A01G024500	tr|M7YN42|M7YN42_TRIUA	N-carbamoylputrescine amidase
			5A	19229384	19232950	TraesCS5A01G024600	tr|A0A072TGX0|A0A072TGX0_MEDTR	Disease resistance protein
			5A	19234582	19235181	TraesCS5A01G024700	tr|A0A0B2S2J8|A0A0B2S2J8_GLYSO	Protein FANTASTIC FOUR 3
			5A	19253819	19255757	TraesCS5A01G024800	AT5G19520.2	mechanosensitive channel of small conductance-like 9
			5A	19268602	19273477	TraesCS5A01G024900	tr|M8ASA4|M8ASA4_AEGTA	5-methyltetrahydropteroyltriglutamate--homocysteine methyltransferase
			5A	709416470	709420264	TraesCS5A01G558600	tr|M7YZ61|M7YZ61_TRIUA	Phenylalanine ammonia-lyase
			5A	709479030	709482133	TraesCS5A01G558700	tr|Q2RB42|Q2RB42_ORYSJ	Transposon protein, putative, Mutator sub-class
			5A	709530981	709531556	TraesCS5A01G558800	AT1G08600.4	P-loop containing nucleoside triphosphate hydrolases superfamily protein
			5A	709674687	709676514	TraesCS5A01G558900	tr|A0A103YCL0|A0A103YCL0_CYNCS	Nucleic acid-binding, OB-fold
QKWpur-5B.1	S5B_40758976	40758976	5B	40557506	40557958	TraesCS5B01G036400	tr|Q7XEE7|Q7XEE7_ORYSJ	BTB/POZ domain containing protein, expressed
			5B	40775378	40776860	TraesCS5B01G036500	tr|Q7XEC2|Q7XEC2_ORYSJ	BTB/POZ domain containing protein, expressed
			5B	40784777	40789970	TraesCS5B01G036600	tr|R7WD41|R7WD41_AEGTA	Subtilisin-like protease
			5B	40980944	40982311	TraesCS5B01G036700	tr|G7JRN3|G7JRN3_MEDTR	Phospholipase A1
QKWpur-5B.2	S5B_621265933	621265933	5B	621230800	621231921	TraesCS5B01G448600	tr|Q5Z8K4|Q5Z8K4_ORYSJ	Kinase-like
			5B	621237121	621238278	TraesCS5B01G448700	tr|Q67UH1|Q67UH1_ORYSJ	Mitochondrial transcription termination factor-like
			5B	621259658	621261713	TraesCS5B01G448800	AT1G70750.1	myosin-binding protein (Protein of unknown function, DUF593)
			5B	621263041	621267403	TraesCS5B01G448900	tr|G7I3Y8|G7I3Y8_MEDTR	TPX2 (Targeting protein for Xklp2) family protein
			5B	621397932	621398931	TraesCS5B01G449000	tr|O65795|O65795_WHEAT	Histone H1
			5B	621463290	621465523	TraesCS5B01G449100	sp|Q8VHU4|ELP1_RAT	Elongator complex protein 1
			5B	621467396	621471465	TraesCS5B01G449200	sp|P93194|RPK1_IPONI	Receptor-like protein kinase
			5B	621476503	621480029	TraesCS5B01G449300	sp|P93194|RPK1_IPONI	Receptor-like protein kinase
	S6A_102200443	102200443	6A	102119095	102126224	TraesCS6A01G130600	tr|A0A199W137|A0A199W137_ANACO	Coatomer subunit beta'-1
			6A	102126920	102127533	TraesCS6A01G130700	tr|A0A1J6IIE6|A0A1J6IIE6_NICAT	Mediator of rna polymerase ii transcription subunit 32
			6A	102134300	102154734	TraesCS6A01G130800	tr|Q0WZC2|Q0WZC2_WHEAT	RNA ligase isoform 1
	S6A_454330230	454330230	6A	454091478	454093845	TraesCS6A01G242400	tr|A0A072UPK8|A0A072UPK8_MEDTR	Glycerol-3-phosphate transporter
			6A	454348850	454349655	TraesCS6A01G242500	tr|M7YK56|M7YK56_TRIUA	Blue copper protein
			6A	454386319	454390586	TraesCS6A01G242600	tr|A0A191Y212|A0A191Y212_GOSBA	Shikimate/quinate hydroxycinnamoyl transferase
			6A	454546362	454547969	TraesCS6A01G242700	tr|A0A087FXA5|A0A087FXA5_ARAAL	Phospholipase a1-chloroplastic-like
			6B	454502165	454525616	TraesCS6B01G253200	tr|B9GR98|B9GR98_POPTR	CLIP-associating family protein
QKWpur-7A.1	S7A_664311815	664311815	7A	664096669	664098553	TraesCS7A01G468000	tr|G7LEC4|G7LEC4_MEDTR	Pathogenic type III effector avirulence factor Avr AvrRpt-cleavage: cleavage site protein
			7A	664220211	664221346	TraesCS7A01G468100	tr|A0A0K9P1K6|A0A0K9P1K6_ZOSMR	External alternative NAD(P)H-ubiquinone oxidoreductase B2, mitochondrial
			7A	664371644	664371928	TraesCS7A01G468200	tr|A0A0K9PEC1|A0A0K9PEC1_ZOSMR	SAUR-like auxin-responsive protein family
			7A	664414699	664414983	TraesCS7A01G468300	tr|A0A0K9PEC1|A0A0K9PEC1_ZOSMR	SAUR-like auxin-responsive protein family
			7A	664471874	664474574	TraesCS7A01G468400	tr|M7YJT5|M7YJT5_TRIUA	Glutathione S-transferase
	S7A_713758127	713758127	7A	713615056	713615987	TraesCS7A01G536000	tr|M8BUQ8|M8BUQ8_AEGTA	GDSL esterase/lipase
	S7A_713834564	713834564	7A	713649359	713650982	TraesCS7A01G536100	tr|M8BV23|M8BV23_AEGTA	GDSL esterase/lipase
			7A	713737062	713743527	TraesCS7A01G536200	tr|A0A1E5VVJ5|A0A1E5VVJ5_9POAL	Protein MEMO1
			7A	713744006	713745676	TraesCS7A01G536300	tr|M8BLH8|M8BLH8_AEGTA	GDSL esterase/lipase
			7A	713755703	713758945	TraesCS7A01G536400	AT5G18980.1	ARM repeat superfamily protein
			7A	713833498	713835273	TraesCS7A01G536500	tr|M8BIT4|M8BIT4_AEGTA	GDSL esterase/lipase
			7A	713855093	713882676	TraesCS7A01G536600	AT5G18980.1	ARM repeat superfamily protein
			7A	714031908	714033776	TraesCS7A01G536700	tr|M8BIT4|M8BIT4_AEGTA	GDSL esterase/lipase
	S7A_715781215	715781215	7A	715577205	715577717	TraesCS7A01G538300	tr|A0A1D6BL37|A0A1D6BL37_WHEAT	4-hydroxy-4-methyl-2-oxoglutarate aldolase
			7A	715662204	715662716	TraesCS7A01G538400	tr|A0A1D6BL38|A0A1D6BL38_WHEAT	4-hydroxy-4-methyl-2-oxoglutarate aldolase
			7A	715688852	715689886	TraesCS7A01G538500	sp|Q91Z53|GRHPR_MOUSE	Glyoxylate reductase/hydroxypyruvate reductase
			7A	715692171	715700894	TraesCS7A01G538600	tr|A0A1E5ULF9|A0A1E5ULF9_9POAL	Protein ENHANCED DISEASE RESISTANCE 2
			7A	715765253	715771963	TraesCS7A01G538700	tr|B9R8T2|B9R8T2_RICCO	Hydroxysteroid dehydrogenase, putative
			7A	715781021	715785073	TraesCS7A01G538800	tr|A0A1D1XT77|A0A1D1XT77_9ARAE	F-box protein
QKWpur-7A.3	S7A_716611061	716611061	7A	716402410	716405557	TraesCS7A01G539300	sp|P93194|RPK1_IPONI	Receptor-like protein kinase
			7A	716415300	716417915	TraesCS7A01G539400	tr|M8BZK3|M8BZK3_AEGTA	Disease resistance protein RPM1
			7A	716417995	716419665	TraesCS7A01G539500	tr|M8BZK3|M8BZK3_AEGTA	Disease resistance protein RPM1
			7A	716505095	716506638	TraesCS7A01G539600	tr|W9RS74|W9RS74_9ROSA	Two-component response regulator
			7A	716607095	716608217	TraesCS7A01G539700	tr|U6EG29|U6EG29_POPCA	Response regulator
QKWpur-7B.1	S7B_93328187	93328187	7B	93435354	93438875	TraesCS7B01G082500	tr|A0A061FG90|A0A061FG90_THECC	O-fucosyltransferase family protein
			7B	93440705	93441294	TraesCS7B01G082600	tr|B9SSG1|B9SSG1_RICCO	Heat-shock protein, putative
			7B	93462197	93462565	TraesCS7B01G082700	AT4G02900.4	ERD (early-responsive to dehydration stress) family protein
			7B	93462694	93465321	TraesCS7B01G082800	tr|B3V7A0|B3V7A0_9VIRU	Polyprotein
			7B	93571628	93572377	TraesCS7B01G082900	tr|B9SSG1|B9SSG1_RICCO	Heat-shock protein, putative
	S7B_418617539	418617539	7B	418734603	418773413	TraesCS7B01G222800	AT5G24280.3	gamma-irradiation and mitomycin c induced 1
			7B	418857032	418858510	TraesCS7B01G222900	tr|A0A1D6SDG5|A0A1D6SDG5_WHEAT	Auxin-responsive protein
	S7B_486028804	486028804	7B	485825619	485834000	TraesCS7B01G265000	tr|A0A1D6C1P7|A0A1D6C1P7_WHEAT	Xyloglucan endotransglucosylase/hydrolase
QKWpur-7B.2	S7B_515464182	515464182	7B	515591560	515591990	TraesCS7B01G281500	tr|B6SQA2|B6SQA2_MAIZE	60S ribosomal protein L28
	S7D_620713767	620713767	7D	620474027	620474297	TraesCS7D01G524500	AT4G10200.2	TTF-type zinc finger protein with HAT dimerization domain-containing protein
			7D	620475493	620476610	TraesCS7D01G524600	tr|A0A0K9Q2G9|A0A0K9Q2G9_ZOSMR	12-oxophytodienoate reductase
	S7D_620713767	620713767	7D	620490046	620492546	TraesCS7D01G524700	tr|B6SYG9|B6SYG9_MAIZE	Protein phosphatase 2C

## Sheet: TS8
MTA Loci	SNP	Position	Chromosome	Gene_start	Gene_end	Gene_ID	Blast-Hit-Accession	Human-Readable-Description
QKLpur-1D	S1D_445262841	445262841	1D	445039660	445040634	TraesCS1D01G363300	tr|A0A059Q168|A0A059Q168_9POAL	WRKY transcription factor
	S1D_445262848	445262848	1D	445056166	445072535	TraesCS1D01G363400	tr|W5ZSG9|W5ZSG9_MAIZE	Myosin
			1D	445072926	445075674	TraesCS1D01G363500	tr|A5A6P9|A5A6P9_TRIMO	Protein phosphatase 2C
			1D	445187192	445188230	TraesCS1D01G363600	tr|A0A1D5S6Y8|A0A1D5S6Y8_WHEAT	Sulfotransferase
			1D	445190184	445197605	TraesCS1D01G363700	tr|A0A1D5SZZ0|A0A1D5SZZ0_WHEAT	Beta-galactosidase
			1D	445227516	445228490	TraesCS1D01G363800	tr|D7MP04|D7MP04_ARALL	Kinase family protein
			1D	445237948	445241030	TraesCS1D01G363900	tr|A0A061GKL9|A0A061GKL9_THECC	Alpha/beta-Hydrolases superfamily protein
			1D	445246543	445247547	TraesCS1D01G364000	tr|C6ZRY1|C6ZRY1_SOYBN	Protein kinase-like protein
			1D	445286225	445287608	TraesCS1D01G364100	tr|C6ZRY1|C6ZRY1_SOYBN	Protein kinase-like protein
			1D	445317507	445318140	TraesCS1D01G364200	tr|A0A151SUI8|A0A151SUI8_CAJCA	Histone H3
			1D	445324948	445325517	TraesCS1D01G364300	tr|D7LYF0|D7LYF0_ARALL	Kinase family protein
			1D	445365906	445366912	TraesCS1D01G364400	tr|K7VQC2|K7VQC2_MAIZE	Histone H4
			1D	445367502	445368033	TraesCS1D01G364500	tr|Q2R0S0|Q2R0S0_ORYSJ	GRF zinc finger family protein
			1D	445386431	445387079	TraesCS1D01G364600	tr|A0A151SUI8|A0A151SUI8_CAJCA	Histone H3
			1D	445389378	445395893	TraesCS1D01G364700	tr|B9HT78|B9HT78_POPTR	Phosphoribosylformylglycinamidine synthase family protein
QKLpur-2A.1	S2A_100650395	100650395	2A	100538266	100540344	TraesCS2A01G152200	tr|Q6T485|Q6T485_WHEAT	Cytochrome P450
			2A	100627134	100628992	TraesCS2A01G152300	tr|Q6T485|Q6T485_WHEAT	Cytochrome P450
			2A	100631313	100633157	TraesCS2A01G152400	tr|Q6T485|Q6T485_WHEAT	Cytochrome P450
			2A	100649863	100657095	TraesCS2A01G152500	tr|Q6T485|Q6T485_WHEAT	Cytochrome P450
			2A	100781451	100782471	TraesCS2A01G152600	AT1G10690.1	cyclin-dependent kinase inhibitor
			2A	100824953	100826650	TraesCS2A01G152700	tr|A0A0D3Q1Y6|A0A0D3Q1Y6_9POAL	MYB transcription factor
			2A	100836469	100837016	TraesCS2A01G152800	tr|A0A0J8B8I8|A0A0J8B8I8_BETVU	DNA topoisomerase
QKLpur-2A.2	S2A_719213278	719213278	2A	718964996	718965658	TraesCS2A01G482600	tr|A0A072UA81|A0A072UA81_MEDTR	Late embryogenesis abundant protein
	S2A_719213280	719213280	2A	718969964	718973228	TraesCS2A01G482700	tr|A0A1E5V6G0|A0A1E5V6G0_9POAL	tRNA (Guanine(10)-N2)-methyltransferase-like protein
			2A	718975865	718976527	TraesCS2A01G482800	tr|B6TTK3|B6TTK3_MAIZE	Harpin-induced protein
			2A	718982065	718982451	TraesCS2A01G482900	AT4G38240.3	alpha-1,3-mannosyl-glycoprotein beta-1,2-N-acetylglucosaminyltransferase
			2A	719204865	719206046	TraesCS2A01G483000	tr|A0A1D5TTD3|A0A1D5TTD3_WHEAT	Glycosyltransferase
			2A	719218058	719221518	TraesCS2A01G483100	tr|M7YTJ6|M7YTJ6_TRIUA	Anthocyanidin reductase
			2A	719256693	719257224	TraesCS2A01G483200	sp|Q9NG98|TOP3A_DROME	DNA topoisomerase 3-alpha
			2A	719273550	719280841	TraesCS2A01G483300	tr|W0TUG3|W0TUG3_ACAMN	Pleiotropic drug resistance ABC transporter
			2A	719302790	719306604	TraesCS2A01G483400	tr|M7ZVS2|M7ZVS2_TRIUA	Organic cation transporter-like protein
			2A	719319166	719320903	TraesCS2A01G483500	tr|M7YZ65|M7YZ65_TRIUA	Organic cation transporter protein
			2A	719344122	719344745	TraesCS2A01G483600	tr|R7W119|R7W119_AEGTA	Elongation factor 1-alpha
			2A	719402488	719405066	TraesCS2A01G483700	tr|M7YZ65|M7YZ65_TRIUA	Organic cation transporter protein
			2A	719454775	719455242	TraesCS2A01G483800	tr|A0A1D1Y705|A0A1D1Y705_9ARAE	Protein FAR1-RELATED SEQUENCE 5
QKLpur-2B.1	S2B_153613233	153613233	2B	153549111	153549386	TraesCS2B01G178200	AT5G51080.3	RNase H family protein
			2B	153580367	153583856	TraesCS2B01G178300	tr|M8CAC1|M8CAC1_AEGTA	B3 domain-containing protein
			2B	153585725	153588003	TraesCS2B01G178400	tr|B9I993|B9I993_POPTR	Haloacid dehalogenase-like hydrolase family protein
			2B	153609535	153612972	TraesCS2B01G178500	tr|A0A0B2SV52|A0A0B2SV52_GLYSO	Protein LTV1 like
			2B	153673500	153674815	TraesCS2B01G178600	tr|A0A191UMR0|A0A191UMR0_SOLDE	Ras family
			2B	153760061	153761866	TraesCS2B01G178700	tr|Q6YZX4|Q6YZX4_ORYSJ	F-box protein-like
			2B	153855100	153859660	TraesCS2B01G178800	tr|B9H0H4|B9H0H4_POPTR	Mitochondrial carrier family protein
QKLpur-2D.2	S2D_631708051	631708051	2D	631480997	631486698	TraesCS2D01G558500	tr|Q6K268|Q6K268_ORYSJ	Ankyrin repeat protein-like
			2D	631543410	631546209	TraesCS2D01G558600	AT4G31480.6	Coatomer, beta subunit
			2D	631744155	631745896	TraesCS2D01G558700	tr|B4G1N4|B4G1N4_MAIZE	CsAtPR5
			2D	631789276	631795951	TraesCS2D01G558800	tr|A0A1D1YZP2|A0A1D1YZP2_9ARAE	Dolichyl-diphosphooligosaccharide--protein glycosyltransferase subunit STT3
			2D	631800314	631804666	TraesCS2D01G558900	tr|Q6K268|Q6K268_ORYSJ	Ankyrin repeat protein-like
			2D	631933895	631935514	TraesCS2D01G559000	tr|A0A1E5V2H5|A0A1E5V2H5_9POAL	Pentatricopeptide repeat-containing protein
			2D	631936672	631941426	TraesCS2D01G559100	tr|A0A199VIH5|A0A199VIH5_ANACO	Plastid division protein CDP1, chloroplastic
			2D	631946306	631947970	TraesCS2D01G559200	tr|G7IE85|G7IE85_MEDTR	Thioredoxin-like protein
			2D	631948259	631949671	TraesCS2D01G559300	tr|A0A1E5VB08|A0A1E5VB08_9POAL	Pentatricopeptide repeat-containing protein
			2D	631957689	631961080	TraesCS2D01G559400	tr|A0A0B2PJM8|A0A0B2PJM8_GLYSO	Dihydroorotate dehydrogenase (Quinone)
QKLpur-3A.1	S3A_593313534	593313534	3A	593176757	593177726	TraesCS3A01G343700	tr|I1KPJ1|I1KPJ1_SOYBN	WRKY transcription factor
			3A	593320916	593321026	TraesCS3A01G343800	tr|A0A075VZ53|A0A075VZ53_AEGBI	Photosystem I reaction center subunit VIII
			3A	593339932	593340959	TraesCS3A01G343900	tr|I1KAM9|I1KAM9_SOYBN	WRKY transcription factor
			3A	593342471	593347174	TraesCS3A01G344000	tr|B6T177|B6T177_MAIZE	Non-green plastid inner envelope membrane protein
			3A	593351177	593357075	TraesCS3A01G344100	tr|G7JSP8|G7JSP8_MEDTR	Methionine-tRNA ligase, putative
			3A	593512665	593513213	TraesCS3A01G344200	tr|Q2R399|Q2R399_ORYSJ	GRF zinc finger family protein
QKLpur-3A.2	S3A_700575251	700575251	3A	700326645	700328121	TraesCS3A01G466500	tr|A0A072VPI2|A0A072VPI2_MEDTR	Calcineurin-like metallo-phosphoesterase superfamily protein
			3A	700422263	700423417	TraesCS3A01G466600	AT3G16210.1	F-box family protein
			3A	700562650	700564244	TraesCS3A01G466700	tr|N1QWJ0|N1QWJ0_AEGTA	Hydroxyethylthiazole kinase
			3A	700568860	700569282	TraesCS3A01G466800	tr|Q7G604|Q7G604_ORYSJ	F-box domain containing protein, expressed
			3A	700572503	700573335	TraesCS3A01G466900	AT5G50220.1	F-box family protein
			3A	700575980	700576594	TraesCS3A01G467000	tr|Q3EBB9|Q3EBB9_ARATH	Late embryogenesis abundant (LEA) hydroxyproline-rich glycoprotein family
			3A	700591417	700593625	TraesCS3A01G467100	tr|A0A1E5WAG7|A0A1E5WAG7_9POAL	UV-stimulated scaffold protein A-like protein
			3A	700700727	700701884	TraesCS3A01G467200	tr|G7LA96|G7LA96_MEDTR	F-box protein
			3A	700727664	700736896	TraesCS3A01G467300	tr|M8AQK1|M8AQK1_TRIUA	E3 ubiquitin-protein ligase BRE1-like 2
			3A	700739165	700740418	TraesCS3A01G467400	AT5G49610.1	F-box family protein
			3A	700746374	700747444	TraesCS3A01G467500	tr|Q5ZCW4|Q5ZCW4_ORYSJ	F-box domain containing protein-like
			3A	700809320	700813976	TraesCS3A01G467600	tr|A0A0B2R252|A0A0B2R252_GLYSO	Vesicle-associated protein 1-2
			3A	701643874	701644542	TraesCS3A01G468800	AT3G06240.1	F-box family protein
	S3A_701892218	701892218	3A	701760303	701761240	TraesCS3A01G468900	tr|Q2R337|Q2R337_ORYSJ	Transposon protein, putative, CACTA, En/Spm sub-class
			3A	701851063	701852648	TraesCS3A01G469000	tr|N1QWJ0|N1QWJ0_AEGTA	Hydroxyethylthiazole kinase
			3A	701856550	701857176	TraesCS3A01G469100	AT5G49610.1	F-box family protein
			3A	701863302	701863913	TraesCS3A01G469200	tr|Q3EBB9|Q3EBB9_ARATH	Late embryogenesis abundant (LEA) hydroxyproline-rich glycoprotein family
			3A	701869598	701870098	TraesCS3A01G469300	tr|A0A061F4Q5|A0A061F4Q5_THECC	F-box family protein, putative
			3A	701891436	701893441	TraesCS3A01G469400	tr|A0A1E5WAG7|A0A1E5WAG7_9POAL	UV-stimulated scaffold protein A-like protein
			3A	701944773	701946253	TraesCS3A01G469500	tr|A0A151RET9|A0A151RET9_CAJCA	Retrovirus-related Pol polyprotein from transposon TNT 1-94
			3A	701988399	701988680	TraesCS3A01G469600	tr|G7LC71|G7LC71_MEDTR	26S proteasome regulatory subunit N5
			3A	702018404	702019633	TraesCS3A01G469700	AT5G50220.1	F-box family protein
			3A	702032287	702042405	TraesCS3A01G469800	tr|M8AQK1|M8AQK1_TRIUA	E3 ubiquitin-protein ligase BRE1-like 2
			3A	702148993	702149595	TraesCS3A01G469900	tr|B6U1E3|B6U1E3_MAIZE	Glycine-rich cell wall structural protein 2
	S3A_702327328	702327328	3A	702264519	702264884	TraesCS3A01G470000	tr|A0A1E5UMR2|A0A1E5UMR2_9POAL	BTB/POZ domain-containing protein
QKLpur-3A.3	S3A_702562965	702562965	3A	702328653	702329249	TraesCS3A01G470100	tr|B6U1E3|B6U1E3_MAIZE	Glycine-rich cell wall structural protein 2
			3A	702379974	702383237	TraesCS3A01G470200	tr|B6U1E3|B6U1E3_MAIZE	Glycine-rich cell wall structural protein 2
			3A	702406603	702408031	TraesCS3A01G470300	AT5G49610.1	F-box family protein
			3A	702420330	702421817	TraesCS3A01G470400	AT5G49610.1	F-box family protein
			3A	702487237	702487506	TraesCS3A01G470500	AT5G52170.3	homeodomain GLABROUS 7
			3A	702490617	702492663	TraesCS3A01G470600	tr|M8C6K6|M8C6K6_AEGTA	Jasmonate O-methyltransferase
			3A	702553735	702555159	TraesCS3A01G470700	tr|M8CG84|M8CG84_AEGTA	Jasmonate O-methyltransferase
			3A	702556090	702558801	TraesCS3A01G470800	tr|M7ZKK7|M7ZKK7_TRIUA	Salicylate O-methyltransferase
			3A	702576985	702577216	TraesCS3A01G470900	tr|A0A061F685|A0A061F685_THECC	Transcription factor TFIIIC, putative isoform 1
QKLpur-3B	S3B_19394721	19394721	3B	19231020	19232858	TraesCS3B01G039500	tr|M8BYD0|M8BYD0_AEGTA	Nuclease S1
			3B	19247476	19251126	TraesCS3B01G039600	tr|M8BDU3|M8BDU3_AEGTA	Nuclease S1
			3B	19257634	19261152	TraesCS3B01G039700	tr|M8BDU3|M8BDU3_AEGTA	Nuclease S1
			3B	19261583	19262814	TraesCS3B01G039800	tr|A0A061EPF5|A0A061EPF5_THECC	Abscisic acid-deficient 4
			3B	19263469	19270289	TraesCS3B01G039900	tr|A0A1D1XEY5|A0A1D1XEY5_9ARAE	Transmembrane protein 214
			3B	19387714	19393525	TraesCS3B01G040000	tr|M4Q630|M4Q630_TRIMO	C2 domain containing protein
			3B	19394360	19396966	TraesCS3B01G040100	tr|Q2R8J2|Q2R8J2_ORYSJ	NBS-LRR disease resistance protein, putative, expressed
QKLpur-4D	S4D_12455323	12455323	4D	12299125	12303254	TraesCS4D01G027400	tr|A0A1D5Y957|A0A1D5Y957_WHEAT	rRNA N-glycosidase
			4D	12368746	12370405	TraesCS4D01G027500	tr|M8B215|M8B215_AEGTA	Heat stress transcription factor A-9
			4D	12408728	12411888	TraesCS4D01G027600	tr|B2KTB0|B2KTB0_WHEAT	Calcium-dependent protein kinase
			4D	12417208	12418832	TraesCS4D01G027700	tr|M8BW76|M8BW76_AEGTA	B3 domain-containing protein
			4D	12432934	12452529	TraesCS4D01G027800	tr|A0A1D1XQI4|A0A1D1XQI4_9ARAE	Inositol hexakisphosphate and diphosphoinositol-pentakisphosphate kinase
			4D	12458784	12464498	TraesCS4D01G027900	tr|W5EPK5|W5EPK5_WHEAT	Plasma membrane ATPase
			4D	12519321	12524668	TraesCS4D01G028000	tr|M8BVV0|M8BVV0_AEGTA	Tetratricopeptide repeat protein 38
			4D	12526369	12528791	TraesCS4D01G028100	tr|A0A1E5WD63|A0A1E5WD63_9POAL	Costars family protein
			4D	12538853	12542955	TraesCS4D01G028200	AT4G13985.1	FBD-associated F-box protein
			4D	12544864	12548210	TraesCS4D01G028300	tr|W9RDZ6|W9RDZ6_9ROSA	TBC1 domain family member
			4D	12598797	12599979	TraesCS4D01G028400	tr|A0A061EIN5|A0A061EIN5_THECC	RNA-binding family protein isoform 1
			4D	12624092	12624959	TraesCS4D01G028500	tr|Q5QLV7|Q5QLV7_ORYSJ	EBNA-1-like protein
			4D	12652991	12657159	TraesCS4D01G028600	tr|A0A0Q3KXH5|A0A0Q3KXH5_BRADI	Serine/threonine-protein kinase
			4D	12658517	12662124	TraesCS4D01G028700	tr|I1J2C4|I1J2C4_BRADI	Serine/threonine-protein kinase
			4D	12667454	12668531	TraesCS4D01G028800	tr|D7KCZ7|D7KCZ7_ARALL	Thioesterase family protein
			4D	12700119	12703878	TraesCS4D01G028900	tr|Q6AV56|Q6AV56_ORYSJ	BHLH family protein, putative, expressed
QKLpur-6A	S6A_131449965	131449965	6A	131228679	131230628	TraesCS6A01G149200	tr|J3UE53|J3UE53_9ASPA	Ubiquitin-conjugating enzyme
	S6A_131449971	131449971	6A	131230859	131234905	TraesCS6A01G149300	tr|A0A1E5UMR1|A0A1E5UMR1_9POAL	Heptahelical transmembrane protein 2
	S6A_131450018	131450018	6A	131443302	131445223	TraesCS6A01G149400	tr|B9RGP8|B9RGP8_RICCO	Tubby protein, putative
			6A	131446117	131453375	TraesCS6A01G149500	tr|B9N225|B9N225_POPTR	Ubiquitin family protein
QKLpur-6B	S6B_21459106	21459106	6B	21284241	21285863	TraesCS6B01G036400	tr|G5DWR5|G5DWR5_SILLA	Chloroplast stem-loop binding protein
	S6B_21459109	21459109	6B	21287399	21287689	TraesCS6B01G036500	AT3G26890.8	meiosis chromosome segregation family protein
	S6B_21459110	21459110	6B	21363097	21363759	TraesCS6B01G036600	tr|M8CJZ3|M8CJZ3_AEGTA	Protein FAR1-RELATED SEQUENCE 5
			6B	21366015	21370782	TraesCS6B01G036700	tr|R7WBJ2|R7WBJ2_AEGTA	Hippocampus abundant transcript-like protein 1
			6B	21373939	21401935	TraesCS6B01G036800	tr|W9RS74|W9RS74_9ROSA	Two-component response regulator
			6B	21414564	21422859	TraesCS6B01G036900	tr|D7KN75|D7KN75_ARALL	Transcription factor jumonji domain-containing protein
			6B	21430628	21435385	TraesCS6B01G037000	sp|B3PB59|RUVB_CELJU	Holliday junction ATP-dependent DNA helicase RuvB
			6B	21458708	21459688	TraesCS6B01G037100	tr|Q67UH1|Q67UH1_ORYSJ	Mitochondrial transcription termination factor-like
QKLpur-6D	S6D_436639209	436639209	6D	436421170	436422315	TraesCS6D01G334300	tr|W5H0K4|W5H0K4_WHEAT	Protein pelota homolog
			6D	436457040	436466306	TraesCS6D01G334400	tr|A0A1J3GVD1|A0A1J3GVD1_NOCCA	Protein RFT1-like protein
			6D	436473685	436474358	TraesCS6D01G334500	tr|A0A1D6A938|A0A1D6A938_WHEAT	Protein pelota homolog
			6D	436493931	436496281	TraesCS6D01G334600	sp|Q6C1L4|CSN12_YARLI	Protein CSN12 homolog
			6D	436543788	436544897	TraesCS6D01G334700	tr|A0A151TV70|A0A151TV70_CAJCA	Serine/threonine protein phosphatase 7 long form isogeny
			6D	436638336	436639478	TraesCS6D01G334800	tr|A0A1D6B3V0|A0A1D6B3V0_WHEAT	Protein pelota homolog
			6D	436715643	436716974	TraesCS6D01G334900	tr|A0A0K9PZ01|A0A0K9PZ01_ZOSMR	RING finger protein
			6D	436733860	436736772	TraesCS6D01G335000	tr|B9T4P9|B9T4P9_RICCO	Ankyrin repeat-containing protein, putative
			6D	436757730	436758317	TraesCS6D01G335100	tr|A0A199V635|A0A199V635_ANACO	U4/U6.U5 small nuclear ribonucleoprotein 27 kDa protein
			6D	436762608	436762952	TraesCS6D01G335200	AT2G30990.5	arginine N-methyltransferase, putative (DUF688)
			6D	436764829	436766844	TraesCS6D01G335300	tr|B8XSM9|B8XSM9_WHEAT	Lectin receptor kinase
			6D	436770030	436772078	TraesCS6D01G335400	tr|E7CWB5|E7CWB5_WHEAT	Lectin receptor kinase
			6D	436798585	436799478	TraesCS6D01G335500	tr|A0A060CXJ6|A0A060CXJ6_MAIZE	BHLH transcription factor
			6D	436832402	436833718	TraesCS6D01G335600	tr|A0A1J3F7T2|A0A1J3F7T2_NOCCA	UDP-glucuronate 4-epimerase 4
			6D	436860922	436863150	TraesCS6D01G335700	tr|C6L7Y5|C6L7Y5_HORBU	F-box protein
			6D	436870373	436887139	TraesCS6D01G335800	tr|D7KWK7|D7KWK7_ARALL	Kinase
			6D	436887251	436890995	TraesCS6D01G335900	tr|M8B040|M8B040_TRIUA	Autophagy-related protein 18
QKLpur-7A.1	S7A_60248641	60248641	7A	60078741	60079950	TraesCS7A01G097400	tr|A0A072U0H4|A0A072U0H4_MEDTR	PHD finger alfin-like protein
			7A	60083945	60084649	TraesCS7A01G097500	tr|W5XK42|W5XK42_AEGLO	ATP synthase subunit alpha
			7A	60094657	60095175	TraesCS7A01G097600	tr|A0A075VVN8|A0A075VVN8_CAPAN	NADH-ubiquinone oxidoreductase chain 1
			7A	60096244	60097404	TraesCS7A01G097700	tr|U3TQL7|U3TQL7_TRITI	ATP synthase subunit a
			7A	60105159	60105951	TraesCS7A01G097800	tr|A0A0E0MN09|A0A0E0MN09_ORYPU	Cytochrome c oxidase subunit 3
			7A	60119568	60119927	TraesCS7A01G097900	tr|A0A1D6WKJ4|A0A1D6WKJ4_SINAR	Orf101b
			7A	60148849	60149103	TraesCS7A01G098000	tr|A0A078JML8|A0A078JML8_BRANA	BnaCnng55980D protein
			7A	60154804	60156378	TraesCS7A01G098100	tr|W5XK57|W5XK57_TRITD	Cytochrome c oxidase subunit 1
			7A	60167525	60167866	TraesCS7A01G098200	tr|W5XKB5|W5XKB5_AEGLO	ATP synthase subunit 9, mitochondrial
			7A	60168230	60169759	TraesCS7A01G098300	tr|U3TRW0|U3TRW0_TRITI	ATP synthase subunit alpha
			7A	60175237	60176590	TraesCS7A01G098400	tr|T1LQW1|T1LQW1_TRIUA	Cytochrome b559 subunit alpha
			7A	60241101	60242675	TraesCS7A01G098500	tr|W5XK57|W5XK57_TRITD	Cytochrome c oxidase subunit 1
			7A	60262755	60264754	TraesCS7A01G098600	tr|M7ZRI2|M7ZRI2_TRIUA	Cytochrome c oxidase subunit 2
			7A	60275667	60276238	TraesCS7A01G098700	tr|U3TRY7|U3TRY7_AEGSP	NADH dehydrogenase subunit 9
			7A	60279476	60279915	TraesCS7A01G098800	sp|Q98631|RDRP_RDVF	RNA-directed RNA polymerase P1
			7A	60280280	60280873	TraesCS7A01G098900	tr|G9HNR8|G9HNR8_PHODC	NADH dehydrogenase subunit 2
			7A	60281068	60281780	TraesCS7A01G099000	sp|B0BPQ4|LPTD_ACTPJ	LPS-assembly protein LptD
			7A	60281982	60282212	TraesCS7A01G099100	sp|P58004|SESN2_HUMAN	Sestrin-2
			7A	60284356	60285001	TraesCS7A01G099200	tr|Q67TN1|Q67TN1_ORYSJ	Mitochondrial DNA orf152b
			7A	60290763	60291341	TraesCS7A01G099300	tr|H6D9S2|H6D9S2_9POAL	ATPase subunit 4
			7A	60327231	60327608	TraesCS7A01G099400	sp|B2UMU4|RS12_AKKM8	30S ribosomal protein S12
			7A	60327653	60328009	TraesCS7A01G099500	tr|U3TQP6|U3TQP6_AEGSP	NADH-ubiquinone oxidoreductase chain 3
			7A	60346993	60348346	TraesCS7A01G099600	tr|T1LQW1|T1LQW1_TRIUA	Cytochrome b559 subunit alpha
QKLpur-7A.2	S7A_672591452	672591452	7A	672783118	672786504	TraesCS7A01G480500	sp|A3MZ32|RAPA_ACTP2	RNA polymerase-associated protein RapA
QKLpur-7A.3	S7A_691163936	691163936	7A	690917988	690918491	TraesCS7A01G501000	tr|A0A1D6C642|A0A1D6C642_WHEAT	Histone H2A
			7A	690929758	690930261	TraesCS7A01G501100	tr|A0A1D6C642|A0A1D6C642_WHEAT	Histone H2A
			7A	690936175	690937250	TraesCS7A01G501200	tr|A0A1D6BPW7|A0A1D6BPW7_WHEAT	Histone H2A
			7A	691129016	691130637	TraesCS7A01G501300	tr|A0A0E0JZU1|A0A0E0JZU1_ORYPU	40S ribosomal protein S27
			7A	691149147	691153542	TraesCS7A01G501400	tr|A0A061GQ98|A0A061GQ98_THECC	Fatty acid hydroxylase superfamily
			7A	691258415	691260048	TraesCS7A01G501500	AT5G45330.3	decapping 5-like protein
			7A	691266377	691267404	TraesCS7A01G501600	AT1G78420.2	RING/U-box superfamily protein
			7A	691271328	691273224	TraesCS7A01G501700	tr|A0A061F284|A0A061F284_THECC	Myelin-associated oligodendrocyte basic protein isoform 1
			7A	691274821	691290122	TraesCS7A01G501800	tr|A0A103YG08|A0A103YG08_CYNCS	Ricin B lectin domain-containing protein
			7A	691412632	691413622	TraesCS7A01G501900	tr|B6TUT8|B6TUT8_MAIZE	Phospholipase A2
QKLpur-7B.1	S7B_111946296	111946296	7B	111901184	111904221	TraesCS7B01G097000	tr|A0A1D6SE82|A0A1D6SE82_WHEAT	Hexosyltransferase
			7B	111942067	111944283	TraesCS7B01G097100	tr|M7YVZ5|M7YVZ5_TRIUA	Laccase
			7B	111994224	111997879	TraesCS7B01G097200	tr|A0A1J3HMM6|A0A1J3HMM6_NOCCA	Protein transport protein Sec61 subunit alpha
			7B	112027443	112031402	TraesCS7B01G097300	tr|M7ZMN1|M7ZMN1_TRIUA	Transcription initiation factor TFIID subunit 10
			7B	112113176	112114201	TraesCS7B01G097400	sp|Q9FG35|TBR_ARATH	Protein trichome birefringence
QKLpur-7B.2	S7B_112634218	112634218	7B	112632794	112635375	TraesCS7B01G097700	sp|O69266|HRCA_LYSSH	Heat-inducible transcription repressor HrcA
QKLpur-7B.3	S7B_113197896	113197896	7B	113041312	113044801	TraesCS7B01G098000	tr|R7W7X4|R7W7X4_AEGTA	Pre-mRNA-splicing factor SYF1
			7B	113060215	113062437	TraesCS7B01G098100	tr|A0A0B0Q0N1|A0A0B0Q0N1_GOSAR	D-ribose-binding periplasmic
			7B	113095709	113096971	TraesCS7B01G098200	tr|W5HUE4|W5HUE4_WHEAT	tRNA (guanine-N(7)-)-methyltransferase
			7B	113097911	113100141	TraesCS7B01G098300	tr|W9SM20|W9SM20_9ROSA	Ankyrin repeat domain-containing protein
	S7B_113442605	113442605	7B	113137774	113143706	TraesCS7B01G098400	tr|Q6Z1B3|Q6Z1B3_ORYSJ	F-box protein-like
	S7B_113572123	113572123	7B	113159797	113163073	TraesCS7B01G098500	tr|B9T2F5|B9T2F5_RICCO	ADP-ribosylation factor, putative
			7B	113195640	113197197	TraesCS7B01G098600	tr|A0A061E6T8|A0A061E6T8_THECC	Thiol-disulfide oxidoreductase DCC
			7B	113198147	113202144	TraesCS7B01G098700	tr|M7Z0K1|M7Z0K1_TRIUA	DNA polymerase lambda
			7B	113202750	113209315	TraesCS7B01G098800	tr|M7ZKW7|M7ZKW7_TRIUA	Pollen-specific protein SF3
			7B	113445014	113445541	TraesCS7B01G098900	tr|A0A059Q035|A0A059Q035_9POAL	SKP1-like protein
			7B	113510705	113512378	TraesCS7B01G099000	sp|P67156|YQFA_SHIFL	UPF0073 inner membrane protein YqfA
			7B	113527391	113531354	TraesCS7B01G099100	tr|A0A1D6CH90|A0A1D6CH90_WHEAT	Peroxidase
			7B	113538748	113539830	TraesCS7B01G099200	tr|A0A1D6CH91|A0A1D6CH91_WHEAT	Peroxidase
			7B	113570995	113572934	TraesCS7B01G099300	tr|A0A1D6CH93|A0A1D6CH93_WHEAT	Peroxidase
			7B	113625423	113627081	TraesCS7B01G099400	tr|F2E3I2|F2E3I2_HORVV	Peroxidase
			7B	113671612	113672016	TraesCS7B01G099500	AT3G25270.1	Ribonuclease H-like superfamily protein
			7B	113801749	113802829	TraesCS7B01G099600	tr|A0A1D6CEH8|A0A1D6CEH8_WHEAT	Peroxidase
QKLpur-7B.4	S7B_114422330	114422330	7B	114178573	114179620	TraesCS7B01G099900	tr|A0A1D6CFX6|A0A1D6CFX6_WHEAT	Xyloglucan endotransglucosylase/hydrolase
			7B	114181108	114193909	TraesCS7B01G100000	tr|I7JNW9|I7JNW9_SOLTU	Ran GTPase activating protein 2
			7B	114393712	114395700	TraesCS7B01G100100	tr|W0TR87|W0TR87_ACAMN	Amino acid permease
			7B	114500400	114505285	TraesCS7B01G100200	tr|A0A0K9Q316|A0A0K9Q316_ZOSMR	Chaperone protein dnaJ
QKLpur-7B.5	S7B_115377252	115377252	7B	115193043	115194239	TraesCS7B01G100400	sp|Q1J4Q3|LACC_STRPF	Tagatose-6-phosphate kinase
			7B	115197787	115199834	TraesCS7B01G100500	tr|A0A103YC06|A0A103YC06_CYNCS	DNA glycosylase
			7B	115237068	115238947	TraesCS7B01G100600	tr|A0A0K9NZ06|A0A0K9NZ06_ZOSMR	U-box domain-containing protein
			7B	115240063	115242619	TraesCS7B01G100700	tr|G7L3A7|G7L3A7_MEDTR	Pyridoxamine 5'-phosphate oxidase family protein
			7B	115286344	115287504	TraesCS7B01G100800	tr|G7K5I2|G7K5I2_MEDTR	Transducin/WD40 repeat protein
			7B	115363109	115364736	TraesCS7B01G100900	tr|Q75GY3|Q75GY3_ORYSJ	F-box domain containing protein
			7B	115373459	115387966	TraesCS7B01G101000	tr|B9SKE9|B9SKE9_RICCO	RNA binding protein, putative
			7B	115401193	115403747	TraesCS7B01G101100	tr|A0A0K9Q0L2|A0A0K9Q0L2_ZOSMR	Phosphoglucosamine mutase
			7B	115404511	115410494	TraesCS7B01G101200	sp|B1LAG3|RECA_THESQ	Protein RecA
			7B	115517164	115521233	TraesCS7B01G101300	tr|G7L1V2|G7L1V2_MEDTR	Aldo/keto reductase family oxidoreductase
			7B	115521682	115526234	TraesCS7B01G101400	tr|A0A1D1XDE3|A0A1D1XDE3_9ARAE	Transmembrane protein 45B
			7B	115560005	115561105	TraesCS7B01G101500	tr|B6U4D1|B6U4D1_MAIZE	Metalloendoproteinase 1
			7B	115562034	115564615	TraesCS7B01G101600	tr|M7ZB79|M7ZB79_TRIUA	Ribosomal RNA small subunit methyltransferase G
QKLpur-7B.6	S7B_611962767	611962767	7B	611718053	611721993	TraesCS7B01G353900	tr|M8C420|M8C420_AEGTA	Transcription initiation factor TFIID subunit 7-like protein
			7B	611729773	611742359	TraesCS7B01G354000	tr|M8AXM0|M8AXM0_TRIUA	Polyubiquitin
			7B	611961698	611962747	TraesCS7B01G354100	tr|Q40641|Q40641_ORYSA	Polyubiquitin
QKLpur-7D.1	S7D_34052488	34052488	7D	33811189	33811536	TraesCS7D01G062200	tr|A0A1J3HNP1|A0A1J3HNP1_NOCCA	Glutathione S-transferase T3
			7D	34010058	34011858	TraesCS7D01G062300	tr|G4V2G0|G4V2G0_GOSHI	NAC domain-containing protein
			7D	34073646	34077368	TraesCS7D01G062400	tr|A0A060A142|A0A060A142_BOENI	NAC domain-containing protein
			7D	34137205	34144037	TraesCS7D01G062500	tr|B9STQ0|B9STQ0_RICCO	26S protease regulatory subunit, putative
			7D	34149256	34151703	TraesCS7D01G062600	tr|G4V2G0|G4V2G0_GOSHI	NAC domain-containing protein
			7D	34229283	34231035	TraesCS7D01G062700	tr|A0A061G2R8|A0A061G2R8_THECC	Lung seven transmembrane receptor family protein
			7D	34301306	34301911	TraesCS7D01G062800	AT1G11960.3	ERD (early-responsive to dehydration stress) family protein
			7D	34302223	34303197	TraesCS7D01G062900	AT1G54650.3	Methyltransferase family protein
QKLpur-7D.2	S7D_612285263	612285263	7D	612317932	612321207	TraesCS7D01G508400	tr|A0A1E5VGS6|A0A1E5VGS6_9POAL	Formamidopyrimidine-DNA glycosylase
	S7D_612285300	612285300	7D	612325814	612328299	TraesCS7D01G508500	AT4G13985.1	FBD-associated F-box protein
			7D	612403702	612406070	TraesCS7D01G508600	AT1G67390.1	F-box family protein
			7D	612425794	612426231	TraesCS7D01G508700	AT4G10200.2	TTF-type zinc finger protein with HAT dimerization domain-containing protein
			7D	612436651	612439575	TraesCS7D01G508800	tr|M8AS56|M8AS56_TRIUA	NF-X1-type zinc finger protein NFXL1
			7D	612515042	612517468	TraesCS7D01G508900	AT3G58980.1	F-box family protein
